# Supplementary material for: Anticooperativity of Multiple Halogen Bonds and Its Effect on Stoichiometry of Cocrystals of Perfluorinated Iodobenzenes
Source: PubMed Central journal article supplement (PMC8991082; doi:10.1021/acs.cgd.2c00077), 2022-03-24
Supplement: cg2c00077_si_001.pdf [file cg2c00077_si_001.pdf]

# Anticooperativity of multiple halogen bonds and its effect on stoichiometry of cocrystals of perfluorinated iodobenzenes

*Nikola Bedeković<sup>1</sup>, Tomislav Piteša<sup>2</sup>, Mihael Eraković<sup>2</sup>, Vladimir Stilinović<sup>\*1</sup>, Dominik Cinčić<sup>\*1</sup>*

<sup>1</sup>Department of Chemistry, Faculty of Science, University of Zagreb, Horvatovac 102a Zagreb, Croatia.

<sup>2</sup> Ruđer Bošković Institute, Bijenička cesta 54, 10 000 Zagreb

E-mail: dominik@chem.pmf.hr, vstilinovic@chem.pmf.hr

## SUPPORTING INFORMATION

## **Table of contents**

Crystallographic data of the prepared compounds (pages 2–6)

ORTEP plots of an asymmetric units of the prepared compounds (pages 7–13)

Crystal structure descriptions and halogen bond parameters (pages 13–18)

Masses and volumes of the reactants used in cocrystal synthesis (pages 19–21)

XRPD patterns of the prepared compounds (pages 22–23)

DSC curves of the prepared compounds (pages 24–37)

**Table S1.** Crystallographic data of the prepared compounds.

|                                                                       | (13tfib)(24lut)                                               | (13tfib)(26lut)                                               | (13tfib)(34lut)                                               | (14tfib)(24lut) <sub>2</sub>                                                 |
|-----------------------------------------------------------------------|---------------------------------------------------------------|---------------------------------------------------------------|---------------------------------------------------------------|------------------------------------------------------------------------------|
| Molecular formula                                                     | C <sub>13</sub> H <sub>9</sub> NF <sub>4</sub> I <sub>2</sub> | C <sub>13</sub> H <sub>9</sub> NF <sub>4</sub> I <sub>2</sub> | C <sub>13</sub> H <sub>9</sub> NF <sub>4</sub> I <sub>2</sub> | C <sub>20</sub> H <sub>18</sub> N <sub>2</sub> F <sub>4</sub> I <sub>2</sub> |
| <i>M</i> / g mol <sup>-1</sup>                                        | 509.4                                                         | 509.4                                                         | 509.4                                                         | 616.0                                                                        |
| Crystal system                                                        | monoclinic                                                    | monoclinic                                                    | monoclinic                                                    | triclinic                                                                    |
| Space group                                                           | <i>P</i> 2 <sub>1</sub> / <i>c</i>                            | <i>C</i> 2/ <i>c</i>                                          | <i>P</i> 2 <sub>1</sub> / <i>c</i>                            | <i>P</i> $\bar{1}$                                                           |
| <i>a</i> / Å                                                          | 9.0971(3)                                                     | 17.2748(62)                                                   | 8.6165(17)                                                    | 7.3917(7)                                                                    |
| <i>b</i> / Å                                                          | 7.6003(3)                                                     | 15.0698(22)                                                   | 22.5549(34)                                                   | 8.7189(9)                                                                    |
| <i>c</i> / Å                                                          | 21.8670(7)                                                    | 14.9191(42)                                                   | 8.1997(15)                                                    | 12.1289(13)                                                                  |
| $\alpha$                                                              | 90                                                            | 90                                                            | 90                                                            | 74.410(9)                                                                    |
| $\beta$                                                               | 100.524(4)                                                    | 128.763(50)                                                   | 114.054(23)                                                   | 78.525(9)                                                                    |
| $\gamma$                                                              | 90                                                            | 90                                                            | 90                                                            | 81.642(9)                                                                    |
| <i>V</i> / Å <sup>3</sup>                                             | 1486.47(11)                                                   | 3028.41(10)                                                   | 1455.18(164)                                                  | 734.36(23)                                                                   |
| <i>Z</i>                                                              | 2                                                             | 8                                                             | 4                                                             | 2                                                                            |
| <i>T</i> / K                                                          | 150                                                           | 150                                                           | 150                                                           | 150                                                                          |
| $\rho_{\text{calc}}$ / g cm <sup>-3</sup>                             | 2.27                                                          | 2.23                                                          | 2.32                                                          | 2.30                                                                         |
| $\mu$ (Mo- <i>K</i> $\alpha$ ) / mm <sup>-1</sup>                     | 4.263                                                         | 4.185                                                         | 4.354                                                         | 4.314                                                                        |
| $\theta_{\text{min,max}}$                                             | 3,9 $\leq \theta \leq$ 27.0                                   | 3,9 $\leq \theta \leq$ 27.0                                   | 2.7                                                           | 3,9 $\leq \theta \leq$ 25.0                                                  |
| <i>F</i> (000)                                                        | 944.0                                                         | 1888.0                                                        | 27.0                                                          | 472.0                                                                        |
| Refl. measured                                                        | 7266                                                          | 4636                                                          | 21218                                                         | 3128                                                                         |
| Refl. unique                                                          | 3223                                                          | 2701                                                          | 3170                                                          | 2431                                                                         |
| Refl. Obs.                                                            | 2752                                                          | 1836                                                          | 2925                                                          | 1763                                                                         |
| <i>R</i> <sub>int</sub>                                               | 0.020                                                         | 0.031                                                         | 0.035                                                         | 0.036                                                                        |
| No. parameters                                                        | 183                                                           | 183                                                           | 181                                                           | 183                                                                          |
| <i>R</i> [ <i>F</i> <sup>2</sup> > 2 $\sigma$ <i>F</i> <sup>2</sup> ] | 0.020                                                         | 0.050                                                         | 0.056                                                         | 0.065                                                                        |
| <i>wR</i> ( <i>F</i> <sup>2</sup> )                                   | 0.045                                                         | 0.134                                                         | 0.020                                                         | 0.182                                                                        |
| <i>S</i>                                                              | 1.012                                                         | 0.947                                                         | 1.107                                                         | 1.005                                                                        |
| $\Delta\rho_{\text{max}}$ / e Å <sup>-3</sup>                         | 0.511                                                         | 2.215                                                         | 0.818                                                         | 3.415                                                                        |
| $\Delta\rho_{\text{min}}$ / e Å <sup>-3</sup>                         | -0.493                                                        | -1.430                                                        | -0.631                                                        | -2.650                                                                       |

Continuation of the Table S1.

|                                                               | <b>(14tfib)(34lut)<sub>2</sub></b>                                           | <b>(14tfib)(3acp)</b>                                          | <b>(14tfib)(4acp)<sub>2</sub></b>                                            | <b>(135titfb)(2pic)<sub>3</sub></b>                                          |
|---------------------------------------------------------------|------------------------------------------------------------------------------|----------------------------------------------------------------|------------------------------------------------------------------------------|------------------------------------------------------------------------------|
| Molecular formula                                             | C <sub>20</sub> H <sub>18</sub> N <sub>2</sub> F <sub>4</sub> l <sub>2</sub> | C <sub>13</sub> H <sub>7</sub> NOF <sub>4</sub> l <sub>2</sub> | C <sub>24</sub> H <sub>14</sub> N <sub>2</sub> F <sub>4</sub> l <sub>2</sub> | C <sub>24</sub> H <sub>28</sub> N <sub>3</sub> F <sub>3</sub> l <sub>3</sub> |
| <i>M</i> / g mol <sup>-1</sup>                                | 616.0                                                                        | 523.01                                                         | 644.1                                                                        | 523.01                                                                       |
| Crystal system                                                | triclinic                                                                    | triclinic                                                      | triclinic                                                                    | orthorhombic                                                                 |
| Space group                                                   | <i>P</i> 1                                                                   | <i>P</i> 1                                                     | <i>P</i> 1                                                                   | <i>Aba</i> 2                                                                 |
| <i>a</i> / Å                                                  | 6.4742(5)                                                                    | 5.9294(3)                                                      | 6.2642(3)                                                                    | 7.4381(4)                                                                    |
| <i>b</i> / Å                                                  | 9.3191(6)                                                                    | 8.9540(6)                                                      | 8.7611(4)                                                                    | 24.6983(12)                                                                  |
| <i>c</i> / Å                                                  | 9.3601(6)                                                                    | 10.7523(8)                                                     | 10.5903(6)                                                                   | 14.6683(8)                                                                   |
| <i>α</i>                                                      | 73.836(5)                                                                    | 70.963(6)                                                      | 109.850(5)                                                                   | 90                                                                           |
| <i>β</i>                                                      | 79.755(5)                                                                    | 81.150(5)                                                      | 101.381(5)                                                                   | 90                                                                           |
| <i>γ</i>                                                      | 72.212(6)                                                                    | 76.701(5)                                                      | 100.735(4)                                                                   | 90                                                                           |
| <i>V</i> / Å <sup>3</sup>                                     | 513.81(12)                                                                   | 523.236(1)                                                     | 515.31(16)                                                                   | 2694.69                                                                      |
| <i>Z</i>                                                      | 2                                                                            | 2                                                              | 2                                                                            | 4                                                                            |
| <i>T</i> / K                                                  | 150                                                                          | 150                                                            | 150                                                                          | 150                                                                          |
| <i>ρ</i> <sub>calc</sub> / g cm <sup>-3</sup>                 | 1.99                                                                         | 2.31                                                           | 2.08                                                                         | 1.93                                                                         |
| <i>μ</i> (Mo- <i>K</i> <sub>α</sub> ) / mm <sup>-1</sup>      | 3.104                                                                        | 4.222                                                          | 3.107                                                                        | 3.516                                                                        |
| <i>θ</i> <sub>min,max</sub>                                   | 4,2 ≤ <i>θ</i> ≤ 27,0                                                        | 4,2 ≤ <i>θ</i> ≤ 27,0                                          | 4,3 ≤ <i>θ</i> ≤ 27,0                                                        | 3,2                                                                          |
| <i>F</i> (000)                                                | 294.0                                                                        | 242.0                                                          | 306.0                                                                        | 27.0                                                                         |
| Refl. measured                                                | 1953                                                                         | 2976                                                           | 3863                                                                         | 11499                                                                        |
| Refl. unique                                                  | 1678                                                                         | 2678                                                           | 2206                                                                         | 2866                                                                         |
| Refl. Obs.                                                    | 1555                                                                         | 2415                                                           | 2037                                                                         | 2524                                                                         |
| <i>R</i> <sub>int</sub>                                       | 0.033                                                                        | 0.029                                                          | 0.061                                                                        | 0.070                                                                        |
| No. parameters                                                | 129                                                                          | 190                                                            | 138                                                                          | 175                                                                          |
| <i>R</i> [ <i>F</i> <sup>2</sup> > 2 <i>σF</i> <sup>2</sup> ] | 0.044                                                                        | 0.062                                                          | 0.037                                                                        | 0.063                                                                        |
| <i>wR</i> ( <i>F</i> <sup>2</sup> )                           | 0.117                                                                        | 0.176                                                          | 0.092                                                                        | 0.146                                                                        |
| <i>S</i>                                                      | 1.014                                                                        | 1.060                                                          | 1.059                                                                        | 1.071                                                                        |
| <i>Δρ</i> <sub>max</sub> / e Å <sup>-3</sup>                  | 1.658                                                                        | 1.469                                                          | 1.439                                                                        | 3.940                                                                        |
| <i>Δρ</i> <sub>min</sub> / e Å <sup>-3</sup>                  | -2.463                                                                       | -1.969                                                         | -2.236                                                                       | -3.014                                                                       |

Continuation of the Table S1.

|                                                                       | (135ftib)(3pic) <sub>3</sub>                                                 | (135ftib)(24lut) <sub>2</sub>                                                | (135ftib)(34lut) <sub>3</sub>                                                | (135ftib)(35lut) <sub>3</sub>                                                |
|-----------------------------------------------------------------------|------------------------------------------------------------------------------|------------------------------------------------------------------------------|------------------------------------------------------------------------------|------------------------------------------------------------------------------|
| Molecular formula                                                     | C <sub>24</sub> H <sub>28</sub> N <sub>3</sub> F <sub>3</sub> l <sub>3</sub> | C <sub>20</sub> H <sub>18</sub> N <sub>2</sub> F <sub>3</sub> l <sub>3</sub> | C <sub>27</sub> H <sub>27</sub> N <sub>3</sub> F <sub>3</sub> l <sub>3</sub> | C <sub>27</sub> H <sub>27</sub> N <sub>3</sub> F <sub>3</sub> l <sub>3</sub> |
| <i>M</i> / g mol <sup>-1</sup>                                        | 523.01                                                                       | 724.1                                                                        | 831.2                                                                        | 831.2                                                                        |
| Crystal system                                                        | monoclinic                                                                   | triclinic                                                                    | monoclinic                                                                   | orthorhombic                                                                 |
| Space group                                                           | <i>P</i> 2 <sub>1</sub> / <i>c</i>                                           | <i>P</i> $\bar{1}$                                                           | <i>P</i> 2 <sub>1</sub>                                                      | <i>Aba</i> 2                                                                 |
| <i>a</i> / Å                                                          | 7.4670(6)                                                                    | 8.8100(7)                                                                    | 7.2806(20)                                                                   | 7.3190(11)                                                                   |
| <i>b</i> / Å                                                          | 15.2254(10)                                                                  | 9.0632(7)                                                                    | 25.8013(50)                                                                  | 26.5945(26)                                                                  |
| <i>c</i> / Å                                                          | 23.0047(18)                                                                  | 14.8394(11)                                                                  | 8.1438(20)                                                                   | 15.2056(10)                                                                  |
| $\alpha$                                                              | 90                                                                           | 84.770(6)                                                                    | 90                                                                           | 90                                                                           |
| $\beta$                                                               | 92.897(7)                                                                    | 75.787(7)                                                                    | 105.176(30)                                                                  | 90                                                                           |
| $\gamma$                                                              | 90                                                                           | 84.101(6)                                                                    | 90                                                                           | 90                                                                           |
| <i>V</i> / Å <sup>3</sup>                                             | 2612.02(10)                                                                  | 1139.85(22)                                                                  | 1476.45(125)                                                                 | 2959.70(29)                                                                  |
| <i>Z</i>                                                              | 4                                                                            | 2                                                                            | 2                                                                            | 4                                                                            |
| <i>T</i> / K                                                          | 150                                                                          | 150                                                                          | 150                                                                          | 150                                                                          |
| $\rho_{\text{calc}}$ / g cm <sup>-3</sup>                             | 2.01                                                                         | 2.11                                                                         | 1.81                                                                         | 1.87                                                                         |
| $\mu$ (Mo-K $\alpha$ ) / mm <sup>-1</sup>                             | 3.628                                                                        | 4.145                                                                        | 3.211                                                                        | 3.207                                                                        |
| $\theta_{\text{min,max}}$                                             | 3,8 $\leq \theta \leq$ 27,0                                                  | 4,1 $\leq \theta \leq$ 27,0                                                  | 3,7 $\leq \theta \leq$ 27,0                                                  | 4,1 $\leq \theta \leq$ 27,0                                                  |
| <i>F</i> (000)                                                        | 1488.0                                                                       | 676.0                                                                        | 762.0                                                                        | 1584.0                                                                       |
| Refl. measured                                                        | 12316                                                                        | 7811                                                                         | 15771                                                                        | 6686                                                                         |
| Refl. unique                                                          | 5614                                                                         | 4828                                                                         | 3281                                                                         | 3034                                                                         |
| Refl. Obs.                                                            | 3568                                                                         | 3735                                                                         | 2327                                                                         | 2361                                                                         |
| <i>R</i> <sub>int</sub>                                               | 0.055                                                                        | 0.047                                                                        | 0.057                                                                        | 0.032                                                                        |
| No. parameters                                                        | 301                                                                          | 257                                                                          | 190                                                                          | 169                                                                          |
| <i>R</i> [ <i>F</i> <sup>2</sup> > 2 $\sigma$ <i>F</i> <sup>2</sup> ] | 0.046                                                                        | 0.052                                                                        | 0.042                                                                        | 0.027                                                                        |
| <i>wR</i> ( <i>F</i> <sup>2</sup> )                                   | 0.098                                                                        | 0.138                                                                        | 0.112                                                                        | 0.064                                                                        |
| <i>S</i>                                                              | 0.866                                                                        | 1.021                                                                        | 0.896                                                                        | 0.896                                                                        |
| $\Delta\rho_{\text{max}}$ / e Å <sup>-3</sup>                         | 2.261                                                                        | 2.104                                                                        | 1.393                                                                        | 0.461                                                                        |
| $\Delta\rho_{\text{min}}$ / e Å <sup>-3</sup>                         | -1.449                                                                       | -1.993                                                                       | -0.695                                                                       | -0.662                                                                       |

Continuation of the Table S1.

|                                                               | (135tftib)(246kol) <sub>3</sub>                                              | (135tftib)(3acp)                                              | (135tftib)(4acp) <sub>2</sub>                                                               | (135tftib)(qin)                                               |
|---------------------------------------------------------------|------------------------------------------------------------------------------|---------------------------------------------------------------|---------------------------------------------------------------------------------------------|---------------------------------------------------------------|
| Molecular formula                                             | C <sub>30</sub> H <sub>33</sub> N <sub>3</sub> F <sub>3</sub> l <sub>3</sub> | C <sub>13</sub> H <sub>7</sub> NF <sub>3</sub> l <sub>3</sub> | C <sub>20</sub> H <sub>14</sub> N <sub>2</sub> O <sub>2</sub> F <sub>3</sub> l <sub>3</sub> | C <sub>15</sub> H <sub>7</sub> NF <sub>3</sub> l <sub>3</sub> |
| <i>M</i> / g mol <sup>-1</sup>                                | 873.3                                                                        | 630.9                                                         | 752.05                                                                                      | 638.9                                                         |
| Crystal system                                                | monoclinic                                                                   | monoclinic                                                    | orthorhombic                                                                                | orthorhombic                                                  |
| Space group                                                   | <i>C2/c</i>                                                                  | <i>P2<sub>1</sub>/c</i>                                       | <i>C2/c</i>                                                                                 | <i>Pbca</i>                                                   |
| <i>a</i> / Å                                                  | 28.413(3)                                                                    | 15.0460(10)                                                   | 32.818(3)                                                                                   | 17.9016(13)                                                   |
| <i>b</i> / Å                                                  | 16.388(2)                                                                    | 8.2903(4)                                                     | 9.2579(10)                                                                                  | 7.3573(6)                                                     |
| <i>c</i> / Å                                                  | 22.645(3)                                                                    | 14.4172(8)                                                    | 7.5254(8)                                                                                   | 25.2611(17)                                                   |
| <i>α</i>                                                      | 90                                                                           | 90                                                            | 90                                                                                          | 90                                                            |
| <i>β</i>                                                      | 111.510(15)                                                                  | 111.176(7)                                                    | 90.10(2)                                                                                    | 90                                                            |
| <i>γ</i>                                                      | 90                                                                           | 90                                                            | 90                                                                                          | 90                                                            |
| <i>V</i> / Å <sup>3</sup>                                     | 9809.87(4)                                                                   | 1676.91(49)                                                   | 2286.41(4)                                                                                  | 3327.07(4)                                                    |
| <i>Z</i>                                                      | 12                                                                           | 4                                                             | 4                                                                                           | 8                                                             |
| <i>T</i> / K                                                  | 150                                                                          | 150                                                           | 150                                                                                         | 150                                                           |
| <i>ρ</i> <sub>calc</sub> / g cm <sup>-3</sup>                 | 1.78                                                                         | 2.50                                                          | 2.18                                                                                        | 2.55                                                          |
| <i>μ</i> (Mo-K <sub>α</sub> ) / mm <sup>-1</sup>              | 2.918                                                                        | 5.618                                                         | 4.144                                                                                       | 5.660                                                         |
| <i>θ</i> <sub>min,max</sub>                                   | 3,8 ≤ <i>θ</i> ≤ 27,0                                                        | 3,9 ≤ <i>θ</i> ≤ 27,0                                         | 4,4 ≤ <i>θ</i> ≤ 25,0                                                                       | 3,8 ≤ <i>θ</i> ≤ 27,0                                         |
| <i>F</i> (000)                                                | 5040.0                                                                       | 1144.0                                                        | 1400.0                                                                                      | 2320.0                                                        |
| Refl. measured                                                | 229999                                                                       | 6185                                                          | 12120                                                                                       | 21807                                                         |
| Refl. unique                                                  | 10513                                                                        | 3575                                                          | 1980                                                                                        | 3616                                                          |
| Refl. Obs.                                                    | 4686                                                                         | 2651                                                          | 1764                                                                                        | 2471                                                          |
| <i>R</i> <sub>int</sub>                                       | 0.085                                                                        | 0.027                                                         | 0.086                                                                                       | 0.083                                                         |
| No. parameters                                                | 545                                                                          | 191                                                           | 139                                                                                         | 199                                                           |
| <i>R</i> [ <i>F</i> <sup>2</sup> > 2σ <i>F</i> <sup>2</sup> ] | 0.047                                                                        | 0.030                                                         | 0.032                                                                                       | 0.041                                                         |
| <i>wR</i> ( <i>F</i> <sup>2</sup> )                           | 0.092                                                                        | 0.067                                                         | 0.068                                                                                       | 0.079                                                         |
| <i>S</i>                                                      | 0.728                                                                        | 0.895                                                         | 1.047                                                                                       | 0.907                                                         |
| <i>Δρ</i> <sub>max</sub> / e Å <sup>-3</sup>                  | 1.143                                                                        | 0.856                                                         | 0.832                                                                                       | 1.624                                                         |
| <i>Δρ</i> <sub>min</sub> / e Å <sup>-3</sup>                  | -1.454                                                                       | -0.980                                                        | -0.815                                                                                      | -1.408                                                        |

Continuation of the Table S1.

|                                                               | (135tftib)(iqin) <sub>2</sub>                                                | (135tftib)(4cnp)                                                            | (135tftib)(akr)                                               |
|---------------------------------------------------------------|------------------------------------------------------------------------------|-----------------------------------------------------------------------------|---------------------------------------------------------------|
| Molecular formula                                             | C <sub>24</sub> H <sub>14</sub> N <sub>2</sub> F <sub>3</sub> l <sub>3</sub> | C <sub>12</sub> H <sub>4</sub> N <sub>2</sub> F <sub>3</sub> l <sub>3</sub> | C <sub>19</sub> H <sub>9</sub> NF <sub>3</sub> l <sub>3</sub> |
| <i>M</i> / g mol <sup>-1</sup>                                | 768.1                                                                        | 629.88                                                                      | 688.9                                                         |
| Crystal system                                                | triclinic                                                                    | monoclinic                                                                  | monoclinic                                                    |
| Space group                                                   | <i>P</i> $\bar{1}$                                                           | <i>P</i> 2 <sub>1</sub> / <i>n</i>                                          | <i>P</i> 2 <sub>1</sub> / <i>c</i>                            |
| <i>a</i> / Å                                                  | 7.9790(4)                                                                    | 4.2374(5)                                                                   | 10.4746(4)                                                    |
| <i>b</i> / Å                                                  | 8.8600(4)                                                                    | 14.2555(20)                                                                 | 12.5092(4)                                                    |
| <i>c</i> / Å                                                  | 17.6834(7)                                                                   | 26.5477(28)                                                                 | 15.1548(5)                                                    |
| $\alpha$                                                      | 89.789(3)                                                                    | 90                                                                          | 90                                                            |
| $\beta$                                                       | 81.841(4)                                                                    | 93.351(10)                                                                  | 102.576(3)                                                    |
| $\gamma$                                                      | 73.975(4)                                                                    | 90                                                                          | 90                                                            |
| <i>V</i> / Å <sup>3</sup>                                     | 1188.54(16)                                                                  | 1600.91(10)                                                                 | 1938.08(13)                                                   |
| <i>Z</i>                                                      | 2                                                                            | 4                                                                           | 4                                                             |
| <i>T</i> / K                                                  | 150                                                                          | 150                                                                         | 150                                                           |
| $\rho_{\text{calc}}$ / g cm <sup>-3</sup>                     | 2.15                                                                         | 2.55                                                                        | 2.36                                                          |
| $\mu$ (Mo- <i>K</i> $\alpha$ ) / mm <sup>-1</sup>             | 3.983                                                                        | 5.878                                                                       | 4.868                                                         |
| $\theta_{\text{min,max}}$                                     | 4,0 ≤ $\theta$ ≤ 27,0                                                        | 4,1 ≤ $\theta$ ≤ 27,0                                                       | 3,7 ≤ $\theta$ ≤ 27,0                                         |
| <i>F</i> (000)                                                | 716.0                                                                        | 1104.0                                                                      | 1264.0                                                        |
| Refl. measured                                                | 8125                                                                         | 6684                                                                        | 11261                                                         |
| Refl. unique                                                  | 5097                                                                         | 3408                                                                        | 4215                                                          |
| Refl. Obs.                                                    | 4094                                                                         | 2477                                                                        | 2535                                                          |
| <i>R</i> <sub>int</sub>                                       | 0.030                                                                        | 0.036                                                                       | 0.054                                                         |
| No. parameters                                                | 289                                                                          | 181                                                                         | 235                                                           |
| <i>R</i> [ <i>F</i> <sup>2</sup> > 2σ <i>F</i> <sup>2</sup> ] | 0.033                                                                        | 0.036                                                                       | 0.032                                                         |
| <i>wR</i> ( <i>F</i> <sup>2</sup> )                           | 0.078                                                                        | 0.077                                                                       | 0.057                                                         |
| <i>S</i>                                                      | 0.954                                                                        | 0.889                                                                       | 0.683                                                         |
| $\Delta\rho_{\text{max}}$ / e Å <sup>-3</sup>                 | 1.138                                                                        | 1.904                                                                       | 0.713                                                         |
| $\Delta\rho_{\text{min}}$ / e Å <sup>-3</sup>                 | -1.498                                                                       | -1.381                                                                      | -0.824                                                        |

## ORTEP plots of an asymmetric units of the prepared compounds

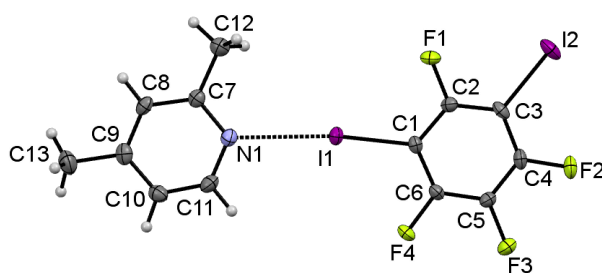

**Figure S1.** Molecular structure of (13tfib)(24lut) showing the atom-labelling scheme. Displacement ellipsoids are drawn at the 50 % probability level, and H atoms are shown as small spheres of arbitrary radius.

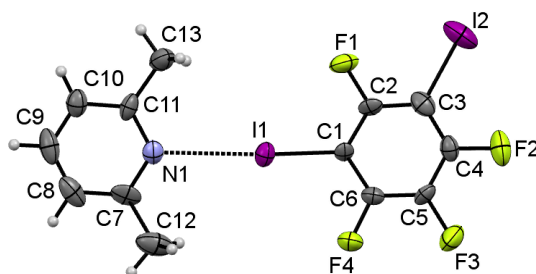

**Figure S2.** Molecular structure of (13tfib)(26lut) showing the atom-labelling scheme. Displacement ellipsoids are drawn at the 50 % probability level, and H atoms are shown as small spheres of arbitrary radius.

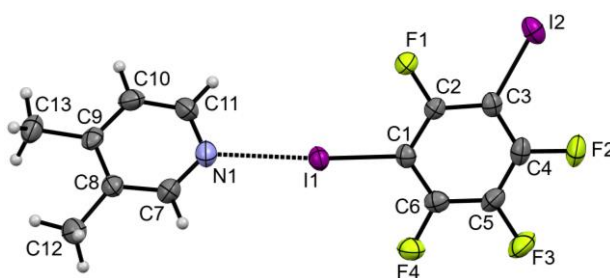

**Figure S3.** Molecular structure of (13tfib)(34lut) showing the atom-labelling scheme. Displacement ellipsoids are drawn at the 50 % probability level, and H atoms are shown as small spheres of arbitrary radius.

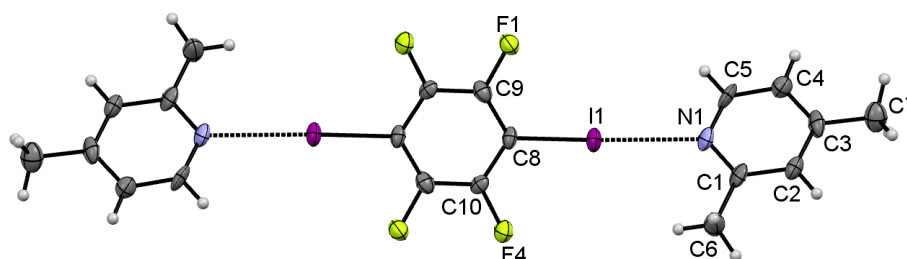

**Figure S4.** Molecular structure of (14tfib)(24lut) showing the atom-labelling scheme. Displacement ellipsoids are drawn at the 50 % probability level, and H atoms are shown as small spheres of arbitrary radius.



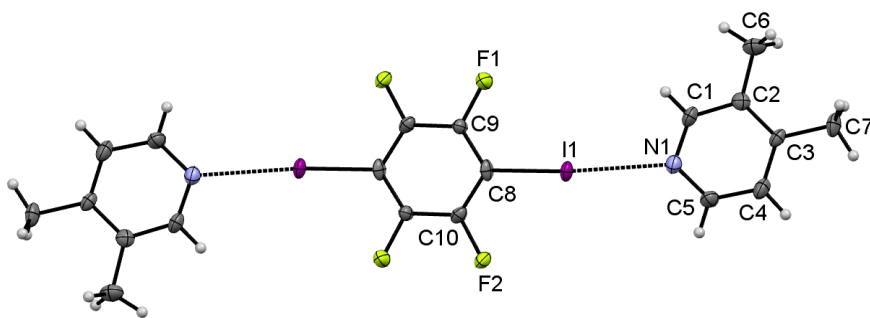

**Figure S5.** Molecular structure of (14tfib)(34lut) showing the atom-labelling scheme. Displacement ellipsoids are drawn at the 50 % probability level, and H atoms are shown as small spheres of arbitrary radius.

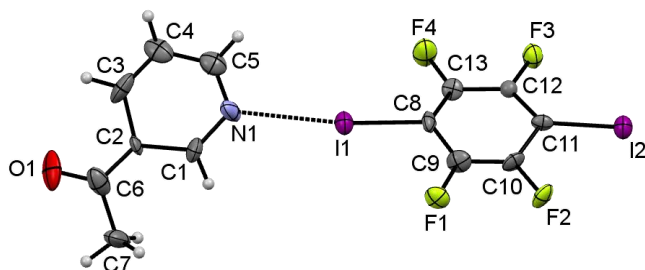

**Figure S6.** Molecular structure of (14tfib)(3acpy) showing the atom-labelling scheme. Displacement ellipsoids are drawn at the 50 % probability level, and H atoms are shown as small spheres of arbitrary radius.

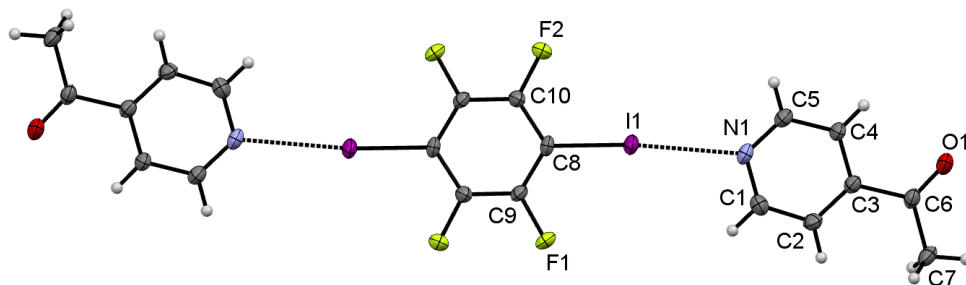

**Figure S7.** Molecular structure of (14tfib)(4acpy) showing the atom-labelling scheme. Displacement ellipsoids are drawn at the 50 % probability level, and H atoms are shown as small spheres of arbitrary radius.

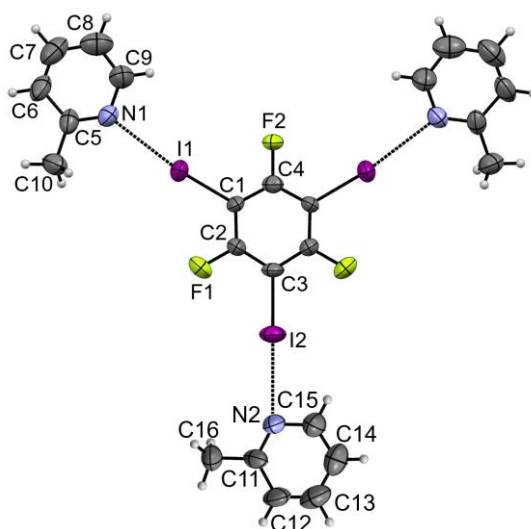

**Figure S8.** Molecular structure of  $(135ftib)(2pic)_3$  showing the atom-labelling scheme. Displacement ellipsoids are drawn at the 50 % probability level, and H atoms are shown as small spheres of arbitrary radius.

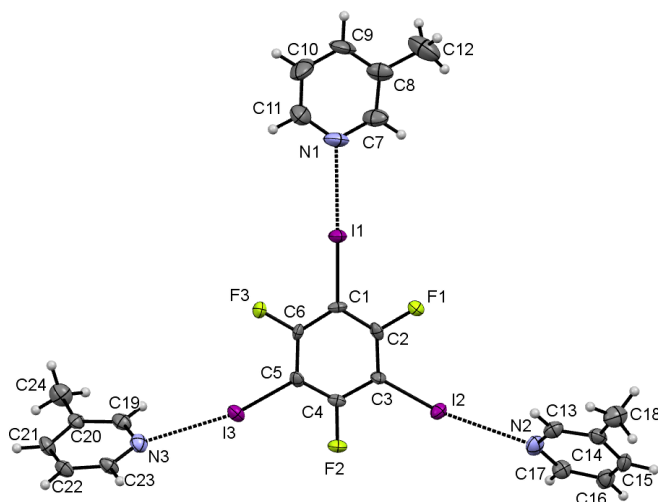

**Figure S9.** Molecular structure of  $(135ftib)(3pic)_3$  showing the atom-labelling scheme. Displacement ellipsoids are drawn at the 50 % probability level, and H atoms are shown as small spheres of arbitrary radius.

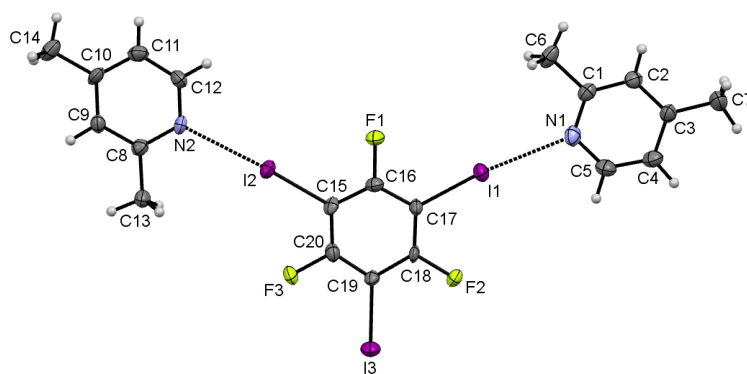

**Figure S10.** Molecular structure of **(135tfib)(24lut)<sub>2</sub>** showing the atom-labelling scheme. Displacement ellipsoids are drawn at the 50 % probability level, and H atoms are shown as small spheres of arbitrary radius.

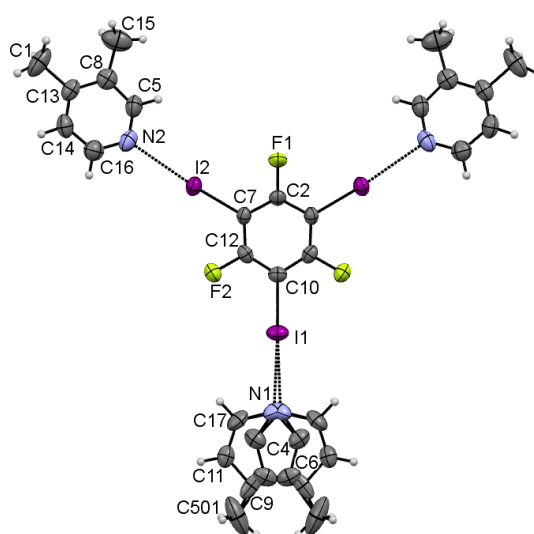

**Figure S11.** Molecular structure of **(135tfib)(34lut)<sub>3</sub>** showing the atom-labelling scheme. Displacement ellipsoids are drawn at the 50 % probability level, and H atoms are shown as small spheres of arbitrary radius.

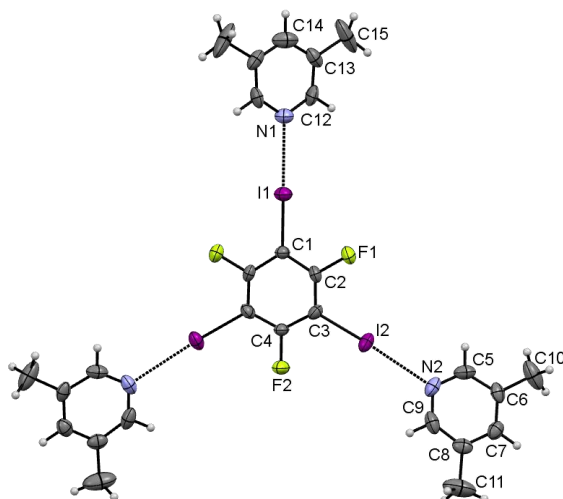

**Figure S12.** Molecular structure of **(135tfib)(35lut)<sub>3</sub>** showing the atom-labelling scheme. Displacement ellipsoids are drawn at the 50 % probability level, and H atoms are shown as small spheres of arbitrary radius.

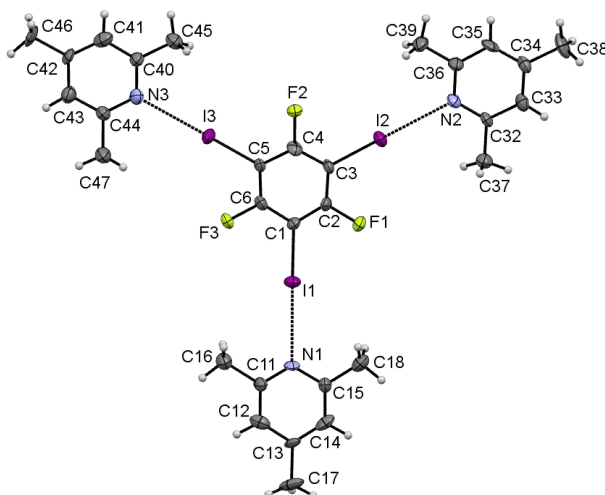

**Figure S13.** Molecular structure of **(135tfib)(246col)<sub>3</sub>** showing the atom-labelling scheme. Displacement ellipsoids are drawn at the 50 % probability level, and H atoms are shown as small spheres of arbitrary radius.

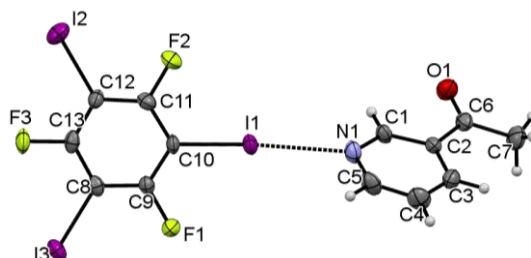

**Figure S14.** Molecular structure of **(135tfib)(3acpy)** showing the atom-labelling scheme. Displacement ellipsoids are drawn at the 50 % probability level, and H atoms are shown as small spheres of arbitrary radius.

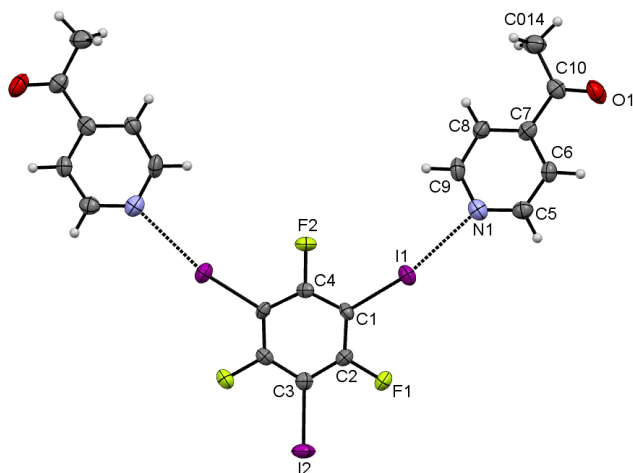

**Figure S15.** Molecular structure of **(135ftib)(4acpy)<sub>2</sub>** showing the atom-labelling scheme. Displacement ellipsoids are drawn at the 50 % probability level, and H atoms are shown as small spheres of arbitrary radius.

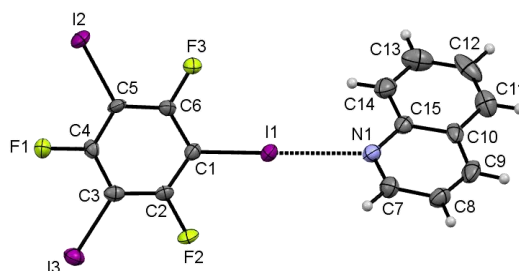

**Figure S16.** Molecular structure of **(135ftib)(qin)** showing the atom-labelling scheme. Displacement ellipsoids are drawn at the 50 % probability level, and H atoms are shown as small spheres of arbitrary radius.

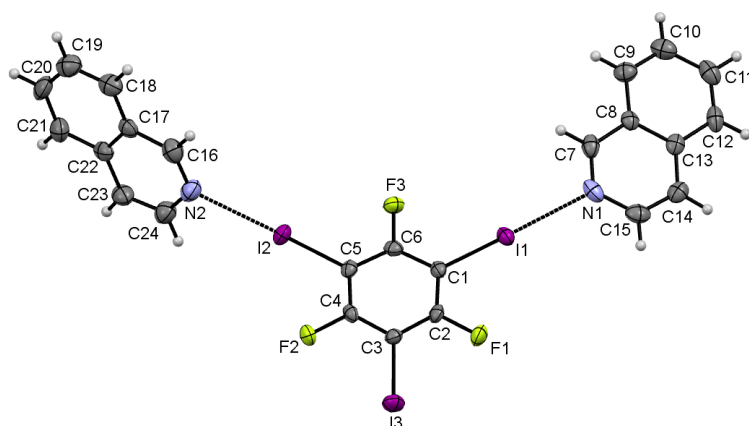

**Figure S17.** Molecular structure of **(135ftib)(iqin)<sub>2</sub>** showing the atom-labelling scheme. Displacement ellipsoids are drawn at the 50 % probability level, and H atoms are shown as small spheres of arbitrary radius.

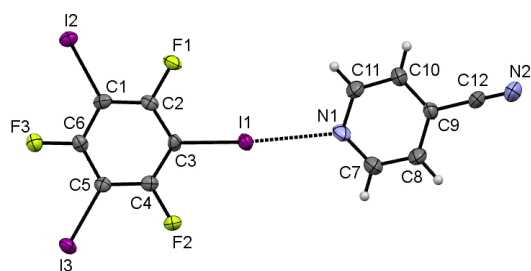

**Figure S18.** Molecular structure of **(135tfib)(4cnpy)** showing the atom-labelling scheme. Displacement ellipsoids are drawn at the 50 % probability level, and H atoms are shown as small spheres of arbitrary radius.

## Crystal structures of the prepared cocrystals

### Crystal structures of the **13tfib** cocrystals

Starting from **13tfib** as donor and **24lut**, **26lut** and **34lut** as XB acceptors, three cocrystals of 1:1 stoichiometry have formed (Fig S19). One halogen bond between pyridine nitrogen and iodine atom has formed in all three compounds, while second iodine is bonded to fluorine– (**(13tfib)(24lut)**), (**(13tfib)(26lut)**) or iodine atom – (**(13tfib)(34lut)**) of an adjacent donor molecules. Formed halogen bond is the shortest in (**(13tfib)(34lut)**) ( $d(\text{I}\cdots\text{N}) = 2.697(2) \text{ \AA}$ ) and followed by (**(13tfib)(24lut)**) ( $d(\text{I}\cdots\text{N}) = 2.815(3) \text{ \AA}$ ) and (**(13tfib)(26lut)**) ( $d(\text{I}\cdots\text{N}) = 2.948(6) \text{ \AA}$ ). Such distances can be explained in terms of more sterical hindrance between **13tfib** molecule and acceptors with methyl group in ortho position (**24lut** and **26lut**), resulting in increase of the bond length.

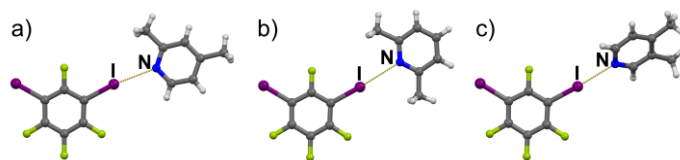

**Figure S19.** Halogen bonded complexes in crystal structures of a) **(13tfib)(24lut)**, b) **(13tfib)(26lut)** and c) **(13tfib)(34lut)**.

**Table S2.** Geometrical parameters of halogen bonds in **13tifb** cocrystals.

| compound                           | halogen bond   | $d / \text{\AA}$ | $r.s. / \%$ | $\mathcal{A}(\text{C-I}\cdots\text{N})/^\circ$ |
|------------------------------------|----------------|------------------|-------------|------------------------------------------------|
| ( <b>13tifb</b> )( <b>4cnpy</b> )  | I1 $\cdots$ N1 | 3.001(1)         | 15.0        | 173.5(4)                                       |
| ( <b>13tifb</b> )( <b>qin</b> )    | I1 $\cdots$ N1 | 2.895(6)         | 18.0        | 173.2(2)                                       |
|                                    | I2 $\cdots$ N2 | 2.912(7)         | 17.5        | 170.3(2)                                       |
| ( <b>13tifb</b> )( <b>iqin</b> )   | I1 $\cdots$ N1 | 2.842(6)         | 19.5        | 176.8(2)                                       |
| ( <b>13tifb</b> )( <b>acr</b> )    | I1 $\cdots$ N1 | 2.992(3)         | 15.2        | 176.3(1)                                       |
| ( <b>13tifb</b> )( <b>35lut</b> )  | I1 $\cdots$ N1 | 2.847(5)         | 19.3        | 175.5(2)                                       |
| ( <b>13tifb</b> )( <b>34lut</b> )  | I1 $\cdots$ N1 | 2.697(2)         | 23.6        | 175.3(1)                                       |
| ( <b>13tifb</b> )( <b>24lut</b> )  | I1 $\cdots$ N1 | 2.815(3)         | 20.2        | 171.5(9)                                       |
| ( <b>13tifb</b> )( <b>26lut</b> )  | I1 $\cdots$ N1 | 2.948(6)         | 16.5        | 176.7(3)                                       |
| ( <b>13tifb</b> )( <b>246col</b> ) | I1 $\cdots$ N1 | 2.962(8)         | 16.1        | 178.6(4)                                       |
|                                    | I1 $\cdots$ N3 | 2.800(4)         | 20.7        | 174.3(2)                                       |
|                                    | I2 $\cdots$ N7 | 2.783(4)         | 21.2        | 171.1(2)                                       |
|                                    | I3 $\cdots$ N5 | 2.781(4)         | 21.2        | 174.6(1)                                       |
| ( <b>13tifb</b> )( <b>dmap</b> )   | I4 $\cdots$ N1 | 2.744(4)         | 22.2        | 171.2(1)                                       |

### Crystal structures of the **14tifb** cocrystals

Cocrystallization of **3acpy**, **4acpy**, **24lut** and **34lut** with XB donor **14tifb** resulted in formation of a four novel cocrystals of 1:2 stoichiometry in which two I $\cdots$ N<sub>py</sub> halogen bonds have established. Two halogen bonds in each cocrystal are symmetrically equivalent and consequently of the same length and angles. The shortest one has found in (**14tifb**)(**26lut**)<sub>2</sub> ( $d(\text{I}\cdots\text{N}) = 2.800(1) \text{ \AA}$ ) which is followed by (**14tifb**)(**34lut**)<sub>2</sub> ( $d(\text{I}\cdots\text{N}) = 2.835(5) \text{ \AA}$ ), (**14tifb**)(**4acpy**)<sub>2</sub> ( $d(\text{I}\cdots\text{N}) = 2.851(4) \text{ \AA}$ ) and (**14tifb**)(**3acpy**)<sub>2</sub> ( $d(\text{I}\cdots\text{N}) = 2.867(3) \text{ \AA}$ ). Molecules are connected in 3D structure by weak C–H $\cdots$ F contacts.

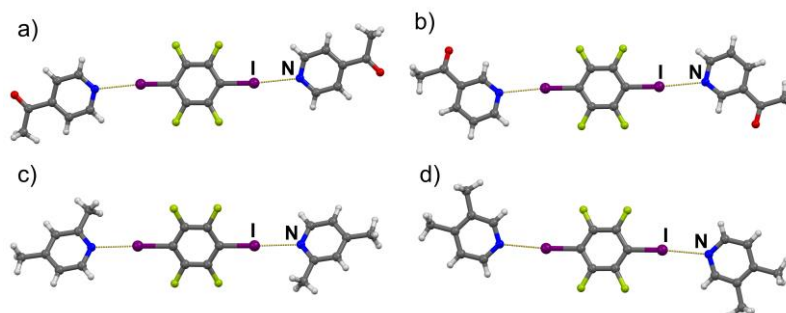**Figure S20.** Halogen bonded complexes in crystal structures of a) (**14tifb**)(**4acpy**), b) (**14tifb**)(**3acpy**), c) (**14tifb**)(**24lut**) and d) (**14tifb**)(**34lut**).

**Table S3.** Geometrical parameters of halogen bonds in **14tifb** cocrystals.

| compound                           | halogen bond   | $d / \text{Å}$ | $r.s. / \%$ | $\mathcal{A}(\text{C-I}\cdots\text{N})/^\circ$ |
|------------------------------------|----------------|----------------|-------------|------------------------------------------------|
| ( <b>14tifb</b> )( <b>4cnpy</b> )  | I1 $\cdots$ N1 | 2.946(8)       | 16.5        | 172.5(3)                                       |
| ( <b>14tifb</b> )( <b>4acpy</b> )  | I1 $\cdots$ N1 | 2.851(4)       | 19.2        | 174.5(1)                                       |
| ( <b>14tifb</b> )( <b>3acpy</b> )  | I1 $\cdots$ N1 | 2.867(3)       | 18.8        | 174.9(1)                                       |
| ( <b>14tifb</b> )( <b>qin</b> )    | I1 $\cdots$ N1 | 2.869(3)       | 18.7        | 174.6(1)                                       |
| ( <b>14tifb</b> )( <b>iqin</b> )   | I1 $\cdots$ N1 | 2.834(6)       | 19.7        | 175.3(2)                                       |
| ( <b>14tifb</b> )( <b>acr</b> )    | I1 $\cdots$ N1 | 2.971(2)       | 15.8        | 176.6(8)                                       |
| ( <b>14tifb</b> )( <b>2pic</b> )   | I1 $\cdots$ N1 | 2.871(4)       | 18.7        | 175.3(2)                                       |
| ( <b>14tifb</b> )( <b>3pic</b> )   | I1 $\cdots$ N1 | 2.781(3)       | 21.2        | 174.4(1)                                       |
| ( <b>14tifb</b> )( <b>4pic</b> )   | I1 $\cdots$ N1 | 2.808(5)       | 20.4        | 179.4(2)                                       |
| ( <b>14tifb</b> )( <b>35lut</b> )  | I1 $\cdots$ N1 | 2.802(4)       | 20.6        | 173.7(1)                                       |
| ( <b>14tifb</b> )( <b>34lut</b> )  | I1 $\cdots$ N1 | 2.835(5)       | 19.7        | 175.3(2)                                       |
| ( <b>14tifb</b> )( <b>24lut</b> )  | I1 $\cdots$ N1 | 2.800(1)       | 20.7        | 177.6(4)                                       |
| ( <b>14tifb</b> )( <b>246col</b> ) | I1 $\cdots$ N1 | 3.007(2)       | 14.8        | 180.0(1)                                       |
| ( <b>14tifb</b> )( <b>dmap</b> )   | I1 $\cdots$ N1 | 2.667(2)       | 24.4        | 179.3(7)                                       |

#### Crystal structures of the **135tifb** cocrystals

Compounds prepared starting from **135tifb** and used XB acceptors can be divided in three groups according to the topicity of the donor molecule in corresponding crystal structure (monotopic, ditopic or tritopic). In cocrystals (**135tifb**)(**acr**), (**135tifb**)(**4cnpy**), (**135tifb**)(**kin**) and (**135tifb**)(**3acpy**) donor molecule is monotopic XB donor (one I $\cdots$ N<sub>py</sub> halogen bond was formed between donor and acceptor molecules which geometries have shown in Table S4). Additional contacts between donor iodine atom and cyano (I $\cdots$ NC) or keto group (I $\cdots$ O) have been found in crystal structures of (**135tifb**)(**4cnpy**) and (**135tifb**)(**3acpy**). Both contacts participate in connecting molecules in 3D crystal structure, but they are noticeably longer than dominant I $\cdots$ N<sub>py</sub> interactions and most likely formed as a consequence of crystal packing (Table S4). In other two compounds, molecules are connected in 3D structure by weak C–H $\cdots$ F contacts.



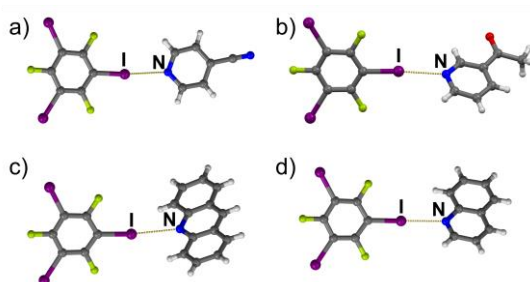

**Figure S21.** 1:1 halogen bonded complexes in cocrystals a) **(135titfb)(4cnpy)**, b) **(135titfb)(3acpy)** and c) **(135titfb)(acr)** and d) **(135titfb)(qin)**.

Two halogen bonds per donor molecule have been formed in three prepared cocrystals – **(135titfb)(ikin)**<sub>2</sub>, **(135titfb)(24lut)**<sub>2</sub> and **(135titfb)(4acpy)**<sub>2</sub>. In **(135titfb)(4acpy)**<sub>2</sub> two halogen bonds are related by symmetry and of equal geometries, while in the others a difference is observed both in the XB lengths and angles (Table S4). Interestingly, despite **4acpy** (as well as **3acpy**) contains keto group prone to participate in halogen bonding, such interaction has not been found in crystal structure of **(135titfb)(4acpy)**<sub>2</sub>. Instead, third iodine atom is connected to fluorine atom of the adjacent donor molecule. In other two compounds, crystal packing of halogen-bonded complexes is achieved by weak C–H···F contacts.

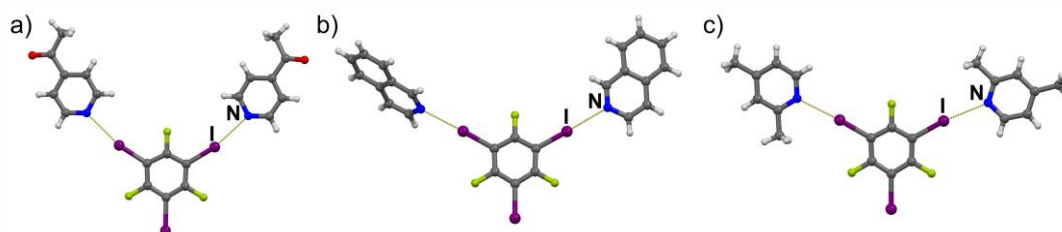

**Figure S22.** Halogen bonded complexes of the 1:2 stoichiometry in cocrystals a) **(135titfb)(iqin)**<sub>2</sub>, b) **(135titfb)(24lut)**<sub>2</sub> and c) **(135titfb)(4acpy)**<sub>2</sub>.

Third group of structures are ones in which all donor atoms of **135tifb** participate in halogen bonding with pyridine nitrogen. In crystal structures of **(135tifb)(246col)**<sub>3</sub> and **(135tifb)(dmap)**<sub>3</sub> two symmetrically independent donor molecules have been found and both such molecules form 1:3 halogen-bonded complexes. In majority of crystal structures two halogen bonds per donor molecule are related by symmetry (and consequently they are of the same geometries) except those found in **(135tifb)(3pic)**<sub>3</sub> and one of the independent molecular complexes in **(135tifb)(246col)**<sub>3</sub> which do have three halogen bonds of the different lengths (Table S4). It is good to notice that cocrystals of 1:3

stoichiometry have generally formed by **135tifb** and strong bases ( $pK_a > 5.7$ ) with the exception of **24lut** ( $pK_a = 6.5$ ) forming 1:2 cocystal.

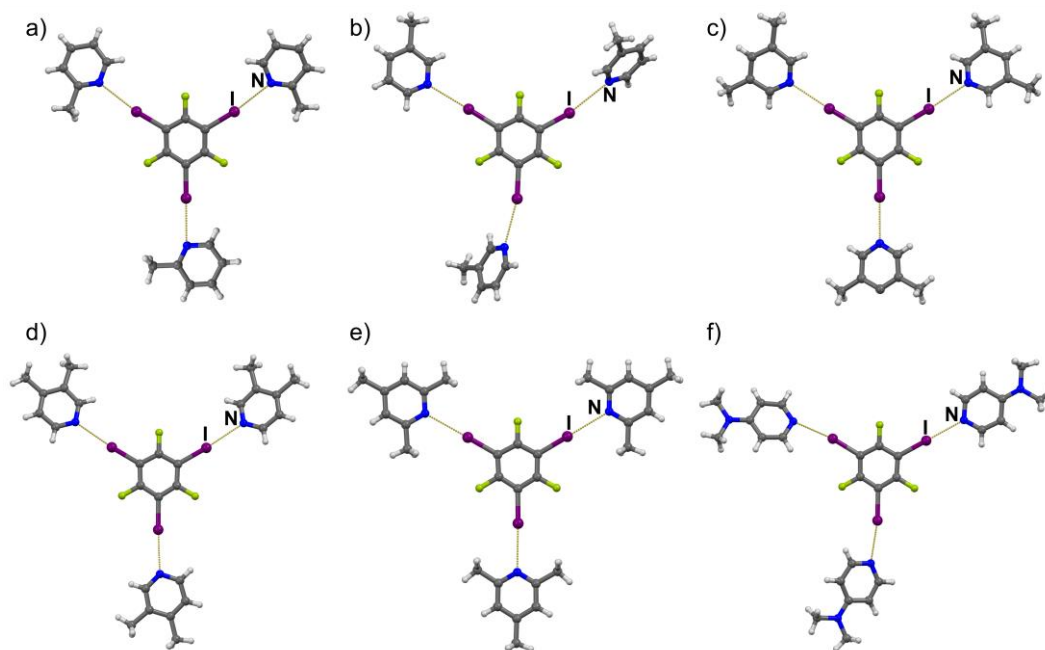

**Figure S23.** 1:3 halogen bonded complexes in cocrystals a) **(135tifb)(2pic)<sub>3</sub>** b) **(135tifb)(3pic)<sub>3</sub>**, c) **(135tifb)(35lut)<sub>3</sub>**, d) **(135tifb)(34lut)<sub>3</sub>** and e) **(135tifb)(246col)<sub>3</sub>** and f) **(135tifb)(dmap)<sub>3</sub>**.

**Table S4.** Geometrical parameters of halogen bonds in **135titfb** cocrystals.

| compound                               | halogen bond   | $d / \text{Å}$ | $r.s. / \%$ | $\mathcal{A}(\text{C-I}\cdots\text{N})/^\circ$ |
|----------------------------------------|----------------|----------------|-------------|------------------------------------------------|
| <b>(135titfb)(dmap)</b> <sub>3</sub>   | I1 $\cdots$ N1 | 2.896(6)       | 18.0        | 170.4(2)                                       |
|                                        | I2 $\cdots$ N2 | 2.777(1)       | 21.3        | 178.1(7)                                       |
|                                        | I3 $\cdots$ N3 | 2.871(7)       | 18.7        | 169.4(2)                                       |
|                                        | I4 $\cdots$ N4 | 2.790(2)       | 21.0        | 176.3(7)                                       |
| <b>(135titfb)(35lut)</b> <sub>3</sub>  | I1 $\cdots$ N1 | 2.790(1)       | 21.0        | 180.0(2)                                       |
|                                        | I2 $\cdots$ N2 | 2.863(8)       | 19.0        | 175.9(3)                                       |
| <b>(135titfb)(34lut)</b> <sub>3</sub>  | I1 $\cdots$ N1 | 2.836(1)       | 19.7        | 176.4(2)                                       |
|                                        | I2 $\cdots$ N2 | 2.879(5)       | 18.4        | 175.4(1)                                       |
| <b>(135titfb)(3pic)</b> <sub>3</sub>   | I1 $\cdots$ N1 | 2.883(6)       | 18.3        | 177.9(2)                                       |
|                                        | I2 $\cdots$ N2 | 3.044(7)       | 13.8        | 168.7(2)                                       |
|                                        | I3 $\cdots$ N3 | 3.008(7)       | 14.8        | 166.5(2)                                       |
| <b>(135titfb)(246kol)</b> <sub>3</sub> | I1 $\cdots$ N1 | 2.967(6)       | 15.6        | 178.3(2)                                       |
|                                        | I2 $\cdots$ N2 | 2.985(3)       | 15.3        | 180.0(2)                                       |
|                                        | I3 $\cdots$ N3 | 2.973(6)       | 15.8        | 178.0(2)                                       |
|                                        | I4 $\cdots$ N4 | 2.971(6)       | 15.3        | 177.5(2)                                       |
|                                        | I5 $\cdots$ N5 | 2.986(7)       | 15.4        | 176.1(2)                                       |
| <b>(135titfb)(ikin)</b> <sub>2</sub>   | I1 $\cdots$ N1 | 2.801(4)       | 20.7        | 178.0(1)                                       |
|                                        | I2 $\cdots$ N2 | 2.823(5)       | 20.0        | 178.4(2)                                       |
| <b>(135titfb)(24lut)</b> <sub>2</sub>  | I1 $\cdots$ N1 | 2.814(7)       | 20.3        | 176.2(2)                                       |
|                                        | I2 $\cdots$ N2 | 2.829(8)       | 19.9        | 173.0(2)                                       |
| <b>(135titfb)(4acpy)</b> <sub>2</sub>  | I1 $\cdots$ N1 | 2.863(4)       | 18.9        | 167.9(2)                                       |
| <b>(135titfb)(acr)</b>                 | I1 $\cdots$ N1 | 3.005(5)       | 14.9        | 173.7(2)                                       |
| <b>(135titfb)(4cnpy)</b>               | I2 $\cdots$ N2 | 2.866(6)       | 18.8        | 174.8(2)                                       |
| <b>(135titfb)(kin)</b>                 | I1 $\cdots$ N1 | 2.826(5)       | 19.9        | 177.9(2)                                       |
| <b>(135titfb)(3acpy)</b>               | I1 $\cdots$ N1 | 2.819(4)       | 20.1        | 175.7(2)                                       |

## Masses and volumes of the reactants used in cocrystal synthesis

**Table S5.** Experimental conditions for mechanochemical synthesis of 1,4-diodotetrafluorobenzene cocrystals.

| acceptor      | $m(\text{acceptor}) / \text{mg}$ | $V(\text{acceptor}) / \mu\text{L}$ | $\rho(\text{acceptor}) / \text{g cm}^{-3}$ | $m(\mathbf{14tfib}) / \text{mg}$ | stoichiometric ratio D:A |
|---------------|----------------------------------|------------------------------------|--------------------------------------------|----------------------------------|--------------------------|
| <b>2pic</b>   | -                                | 33.3                               | 0.943                                      | 68.5                             | 1:2                      |
| <b>3pic</b>   | -                                | 33.3                               | 0.957                                      | 68.5                             | 1:2                      |
| <b>4pic</b>   | -                                | 33.2                               | 0.957                                      | 68.5                             | 1:2                      |
| <b>24lut</b>  | -                                | 37.9                               | 0.927                                      | 67.2                             | 1:2                      |
| <b>26lut</b>  | -                                | 38.6                               | 0.920                                      | 67.2                             | 1:2                      |
| <b>34lut</b>  | -                                | 37.2                               | 0.954                                      | 67.2                             | 1:2                      |
| <b>35lut</b>  | -                                | 37.0                               | 0.939                                      | 65.2                             | 1:2                      |
| <b>246col</b> | -                                | 40.1                               | 0.917                                      | 62.9                             | 1:2                      |
| <b>3acpy</b>  | -                                | 34.8                               | 1.102                                      | 64.3                             | 1:2                      |
| <b>4acpy</b>  | -                                | 35.4                               | 1.095                                      | 64.3                             | 1:2                      |
| <b>qin</b>    | -                                | 36.0                               | 1.090                                      | 60.6                             | 1:2                      |
| <b>iqin</b>   | -                                | 35.5                               | 1.100                                      | 60.6                             | 1:2                      |
| <b>4cnpy</b>  | 34.8                             | -                                  | -                                          | 67.9                             | 1:2                      |
| <b>acr</b>    | 29.1                             | -                                  | -                                          | 19.4                             | 1:2                      |

**Table S6.** Experimental conditions for mechanochemical synthesis of 1,3,5-trifluoro-2,4,6-triiodobenzene cocrystals.

| acceptor      | $m(\text{acceptor}) / \text{mg}$ | $V(\text{acceptor}) / \mu\text{L}$ | $\rho(\text{acceptor}) / \text{g cm}^{-3}$ | $m(\mathbf{135\text{tfib}}) / \text{mg}$ | stoichiometric ratio D:A |
|---------------|----------------------------------|------------------------------------|--------------------------------------------|------------------------------------------|--------------------------|
| <b>2pic</b>   | -                                | 38.3                               | 0.943                                      | 64.6                                     | 1:3                      |
| <b>3pic</b>   | -                                | 37.7                               | 0.957                                      | 64.6                                     | 1:3                      |
| <b>3pic</b>   | -                                | 28.4                               | 0.957                                      | 72.8                                     | 1:2                      |
| <b>3pic</b>   | -                                | 16.4                               | 0.957                                      | 84.3                                     | 1:1                      |
| <b>4pic</b>   | -                                | 38.1                               | 0.957                                      | 64.6                                     | 1:3                      |
| <b>24lut</b>  | -                                | 42.1                               | 0.927                                      | 61.3                                     | 1:3                      |
| <b>26lut</b>  | -                                | 42.9                               | 0.920                                      | 61.3                                     | 1:3                      |
| <b>34lut</b>  | -                                | 41.4                               | 0.954                                      | 61.3                                     | 1:3                      |
| <b>34lut</b>  | -                                | 30.0                               | 0.954                                      | 70.0                                     | 1:2                      |
| <b>34lut</b>  | -                                | 18.5                               | 0.954                                      | 82.3                                     | 1:1                      |
| <b>35lut</b>  | -                                | 42.5                               | 0.939                                      | 61.3                                     | 1:3                      |
| <b>35lut</b>  | -                                | 32.2                               | 0.939                                      | 69.8                                     | 1:2                      |
| <b>35lut</b>  | -                                | 19.0                               | 0.939                                      | 82.2                                     | 1:1                      |
| <b>246col</b> | -                                | 45.9                               | 0.917                                      | 58.4                                     | 1:3                      |
| <b>246col</b> | -                                | 35.4                               | 0.917                                      | 67.6                                     | 1:2                      |
| <b>246col</b> | -                                | 21.2                               | 0.917                                      | 80.6                                     | 1:1                      |
| <b>3acpy</b>  | -                                | 38.5                               | 1.102                                      | 58.4                                     | 1:3                      |
| <b>4acpy</b>  | -                                | 39.2                               | 1.095                                      | 58.4                                     | 1:3                      |
| <b>qin</b>    | -                                | 41.2                               | 1.090                                      | 56.8                                     | 1:3                      |
| <b>iqin</b>   | -                                | 40.5                               | 1.100                                      | 56.8                                     | 1:3                      |
| <b>4cnpy</b>  | 38.8                             | -                                  | -                                          | 62.0                                     | 1:3                      |

**Table S7.** Experimental conditions for mechanochemical synthesis of 1,3-diiodotetrafluorobenzene cocrystals.

| acceptor      | $m(\text{acceptor}) / \text{mg}$ | $V(\text{acceptor}) / \mu\text{L}$ | $\rho(\text{acceptor}) / \text{g cm}^{-3}$ | $V(\mathbf{13tfib}) / \mu\text{L}$ | stoichiometric ratio D:A |
|---------------|----------------------------------|------------------------------------|--------------------------------------------|------------------------------------|--------------------------|
| <b>2pic</b>   | -                                | 34.3                               | 0.943                                      | 25.1                               | 1:2                      |
| <b>3pic</b>   | -                                | 33.8                               | 0.957                                      | 25.1                               | 1:2                      |
| <b>4pic</b>   | -                                | 34.1                               | 0.957                                      | 25.1                               | 1:2                      |
| <b>24lut</b>  | -                                | 37.9                               | 0.927                                      | 23.9                               | 1:2                      |
| <b>26lut</b>  | -                                | 38.6                               | 0.920                                      | 23.9                               | 1:2                      |
| <b>34lut</b>  | -                                | 37.2                               | 0.954                                      | 23.9                               | 1:2                      |
| <b>35lut</b>  | -                                | 38.2                               | 0.939                                      | 23.9                               | 1:2                      |
| <b>246col</b> | -                                | 41.4                               | 0.917                                      | 22.9                               | 1:2                      |
| <b>3acpy</b>  | -                                | 34.8                               | 1.102                                      | 22.9                               | 1:2                      |
| <b>4acpy</b>  | -                                | 35.4                               | 1.095                                      | 22.9                               | 1:2                      |
| <b>qin</b>    | -                                | 37.3                               | 1.090                                      | 22.3                               | 1:2                      |
| <b>iqin</b>   | -                                | 36.7                               | 1.100                                      | 22.3                               | 1:2                      |
| <b>4cnpy</b>  | 31.2                             | -                                  | -                                          | 24.2                               | 1:2                      |
| <b>acr</b>    | 29.1                             | -                                  | -                                          | 19.4                               | 1:2                      |

## XRPD patterns of the prepared compounds

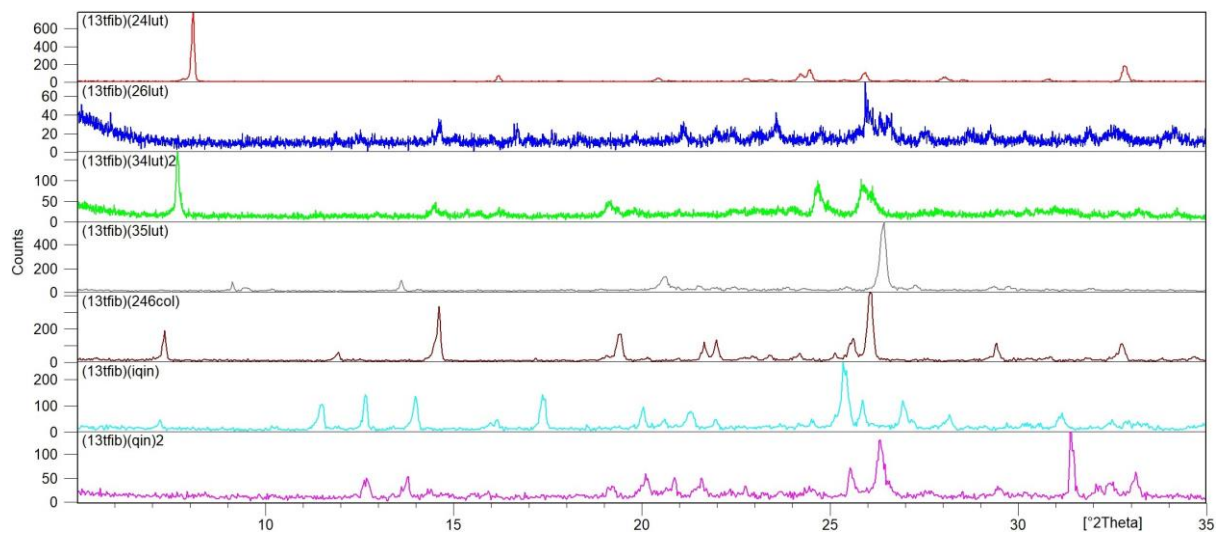

**Figure S24.** XRPD patterns of the **13tfib** cocrystals with the liquid acceptors. **26lut** – red, **34lut** – blue, **35lut** – green, **246col** – grey, **iqin** – brown, **qin** – light blue.

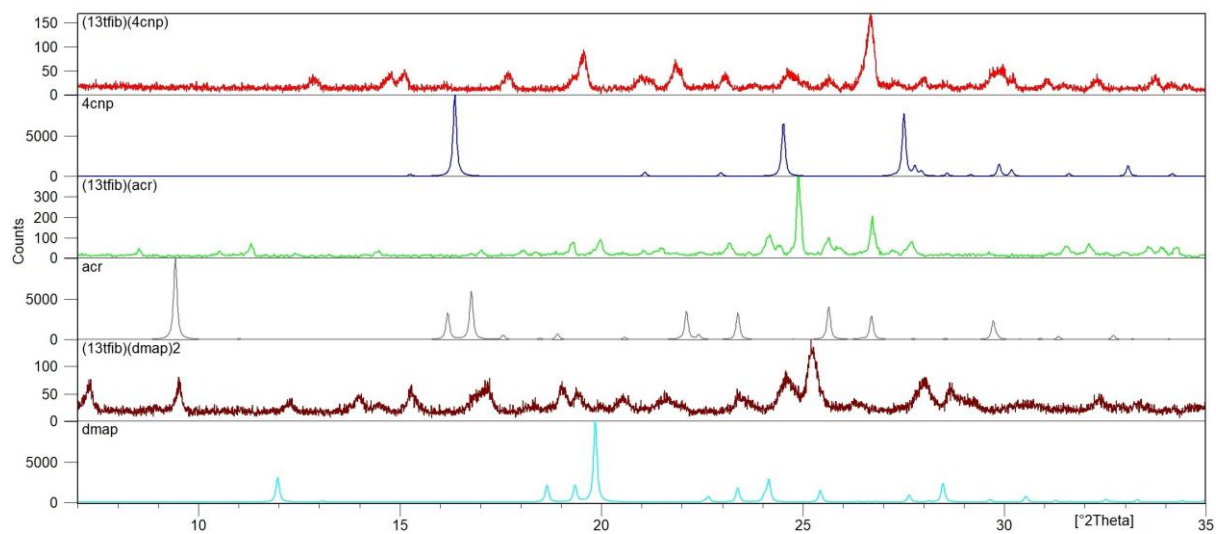

**Figure S25.** Comparison of the XRPD patterns of the **13tfib** cocrystals with the solid acceptors and the XRPD patterns of the pure acceptors.

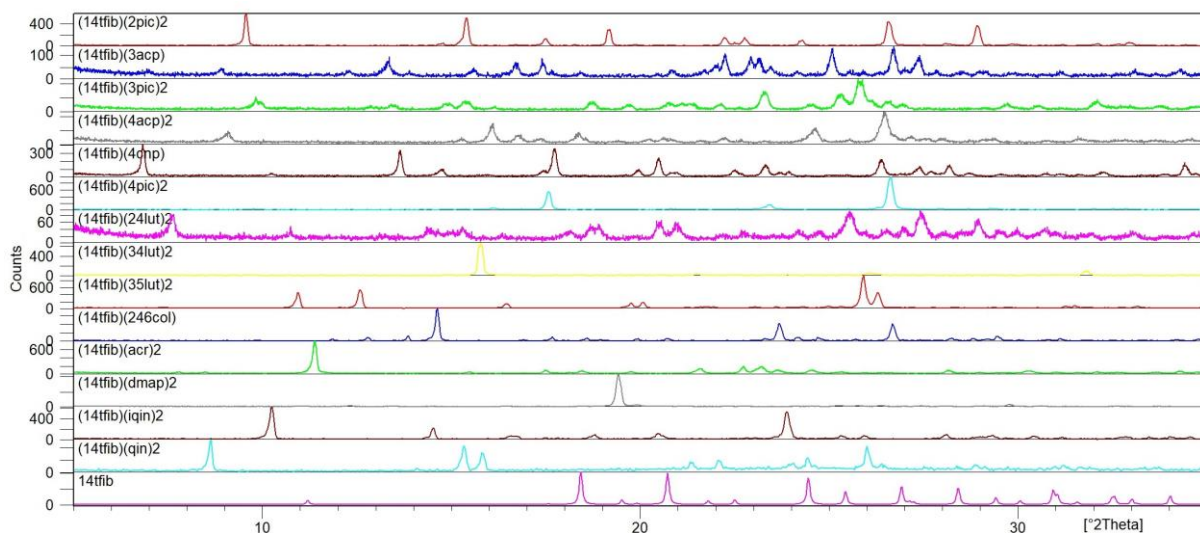

**Figure S26.** Comparison of the XRPD patterns of the **14tfib** cocrystals and the XRPD pattern of the **14tfib**.

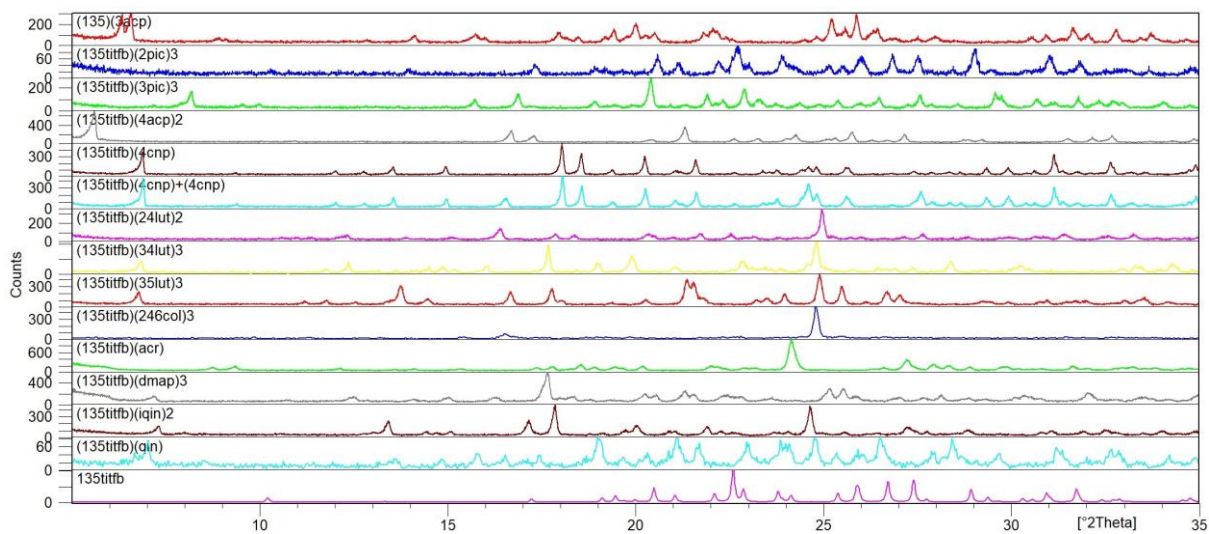

**Figure S27.** Comparison of the XRPD patterns of the **135titfb** cocrystals and the XRPD pattern of the **135titfb**.



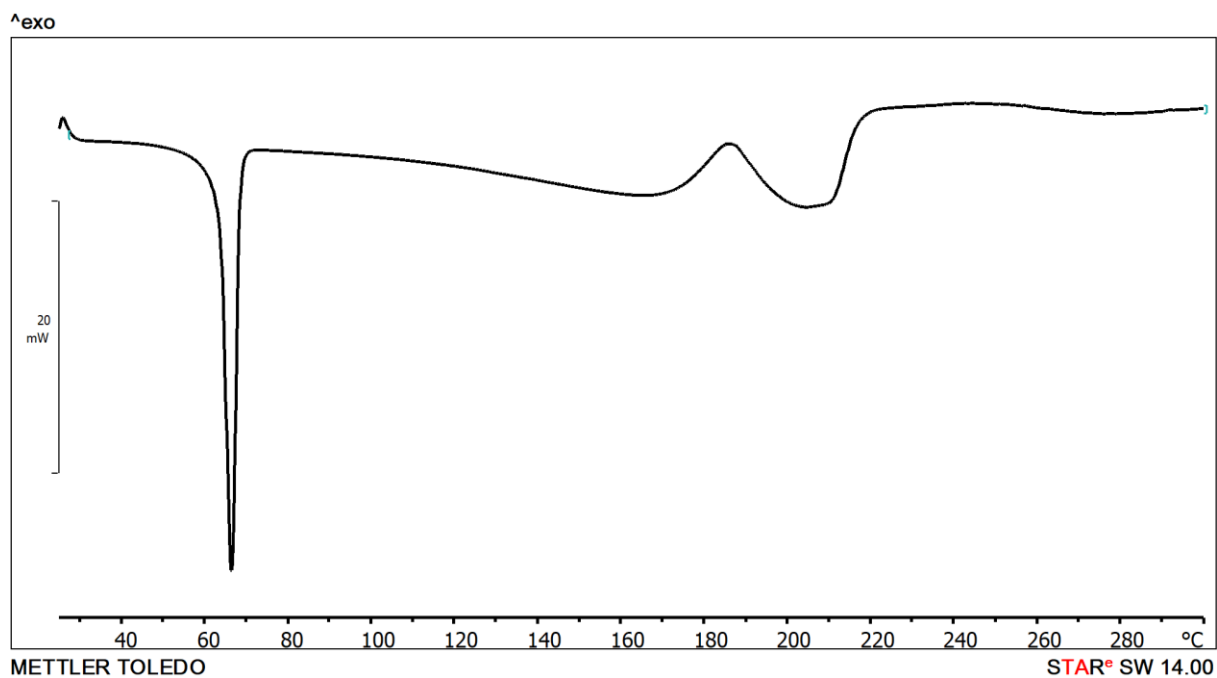

**Figure D28.** DSC thermogram of the (13fib)(24lut).

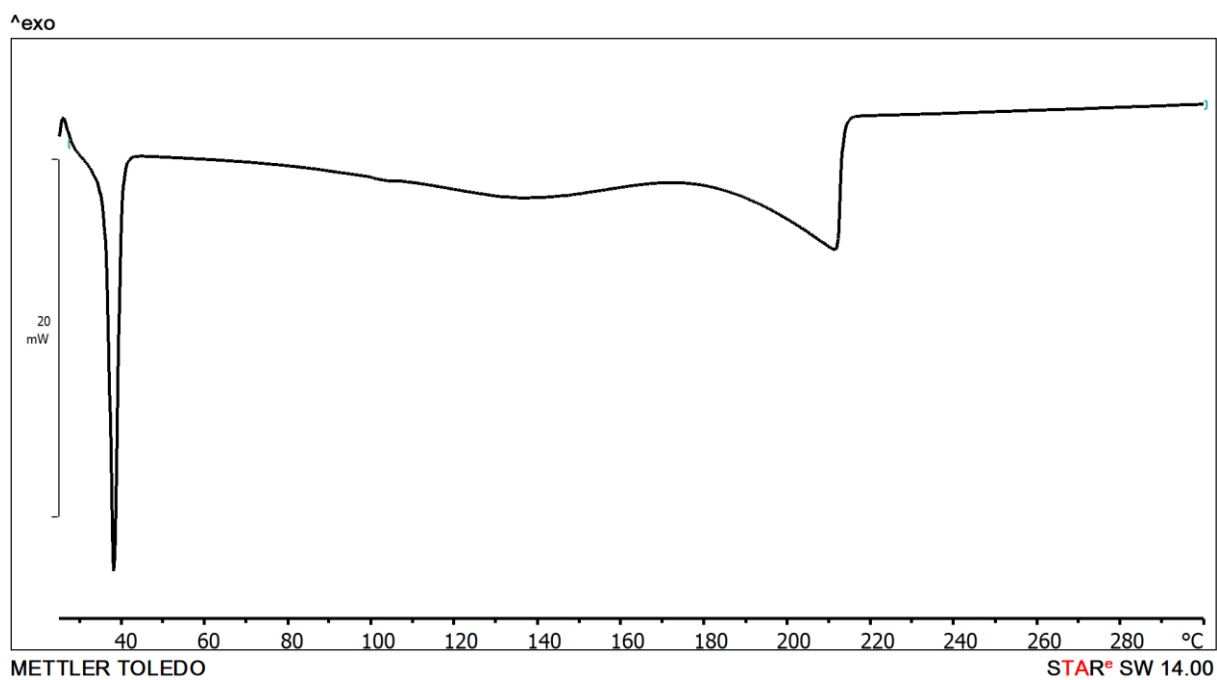

**Figure D29.** DSC thermogram of the (13fib)(26lut).

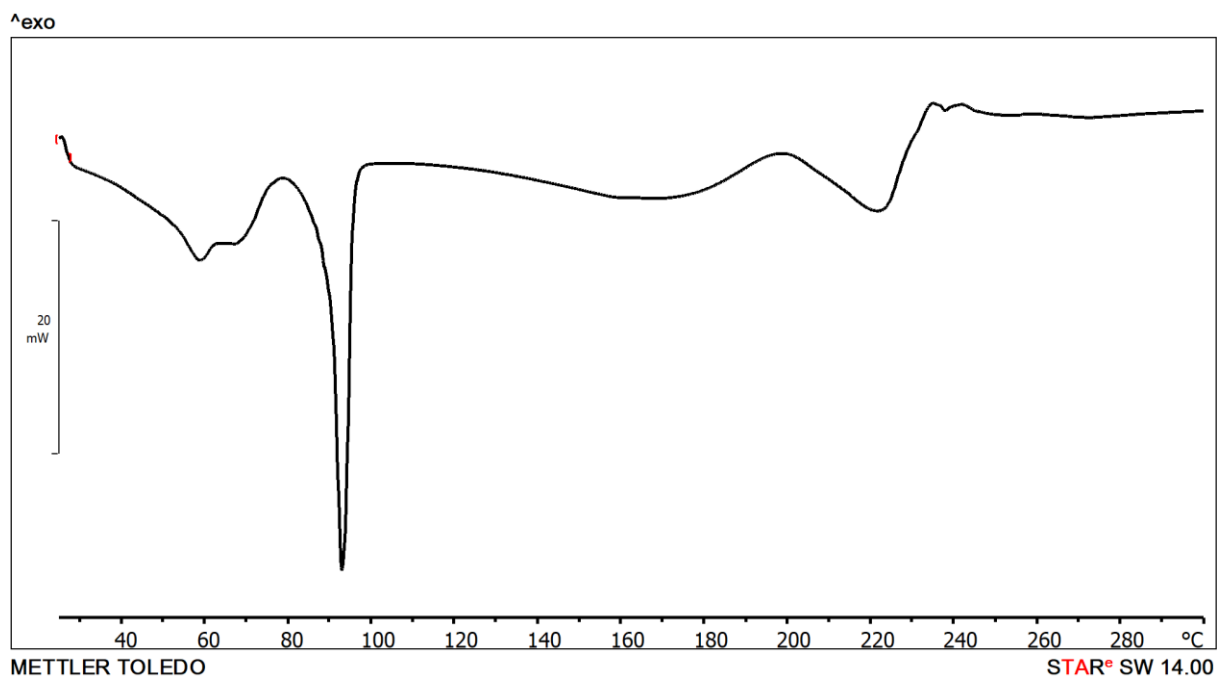

**Figure D30.** DSC thermogram of the (13tfib)(35lut).

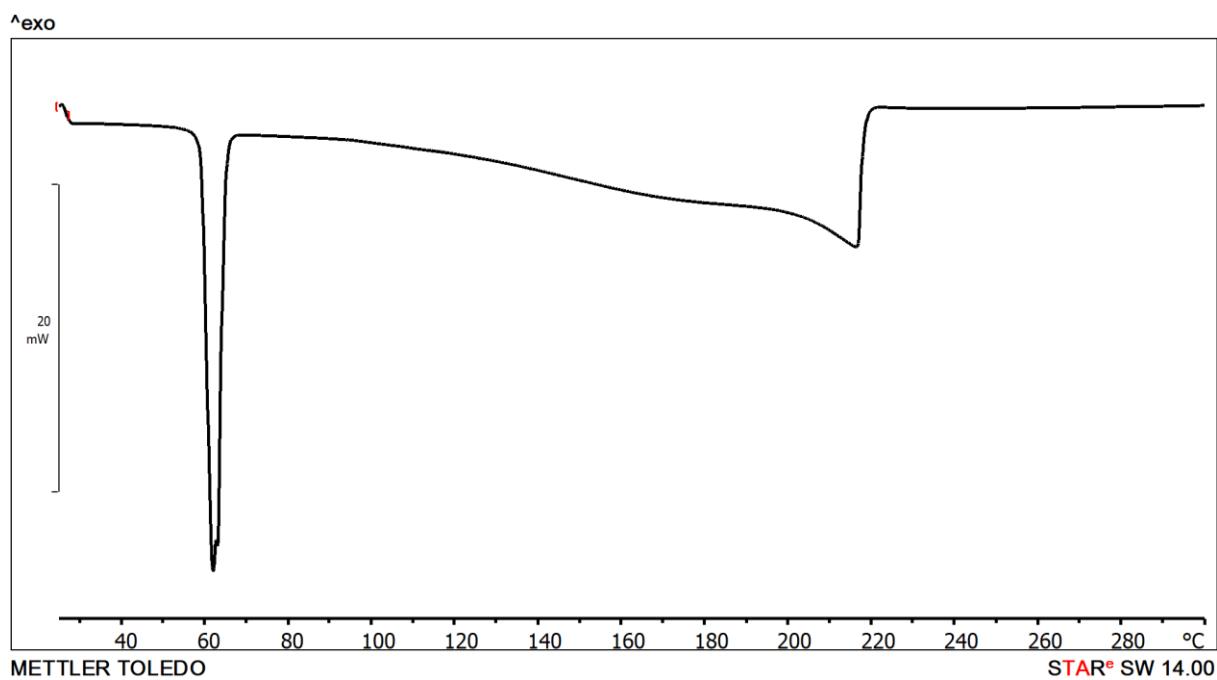

**Figure D31.** DSC thermogram of the (13tfib)(246col).

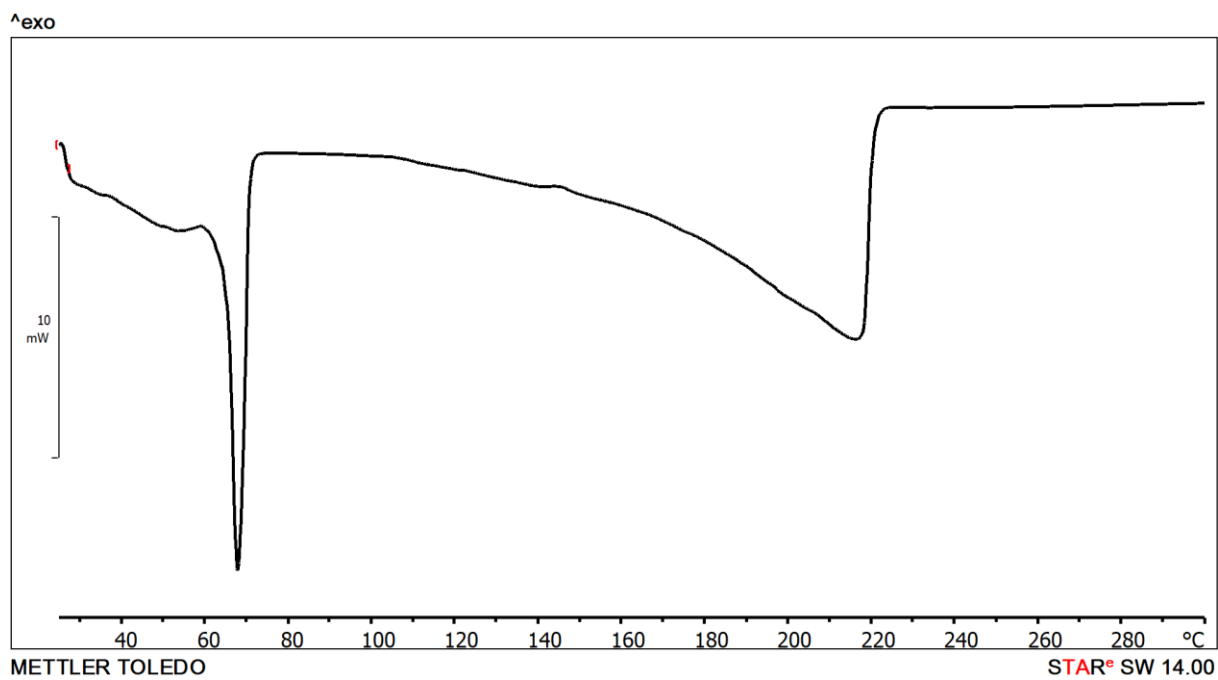

**Figure D32.** DSC thermogram of the (13tfib)(qin).

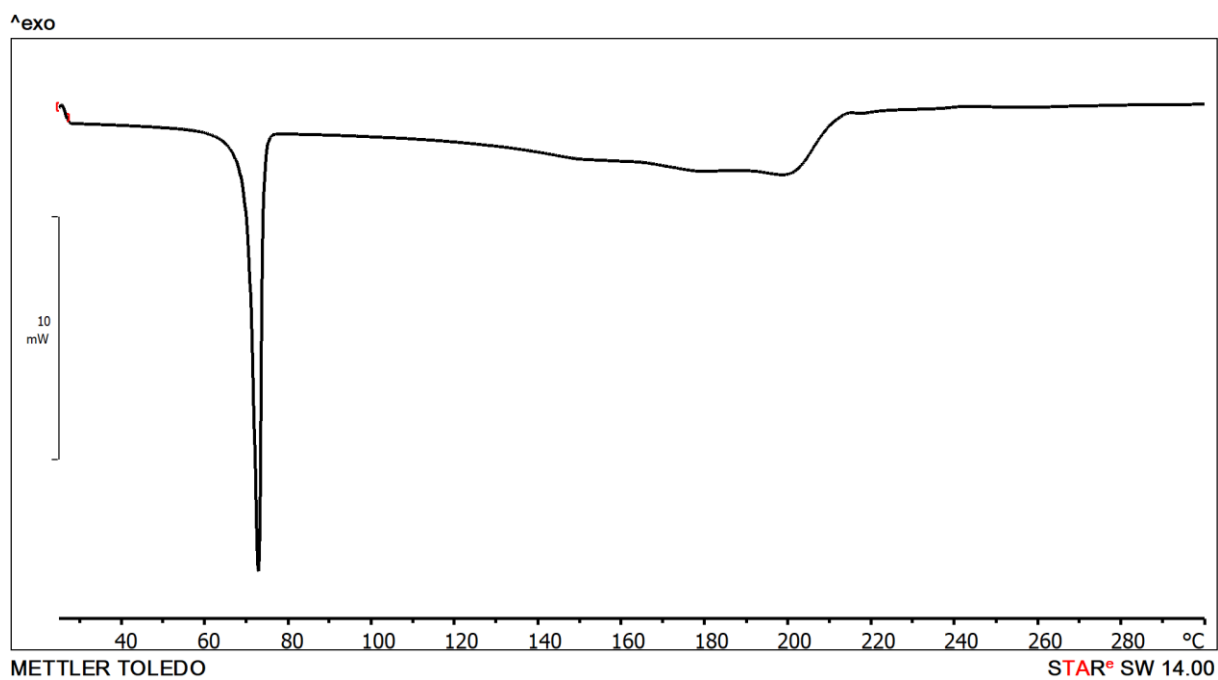

**Figure D33.** DSC thermogram of the (13tfib)(iqin).

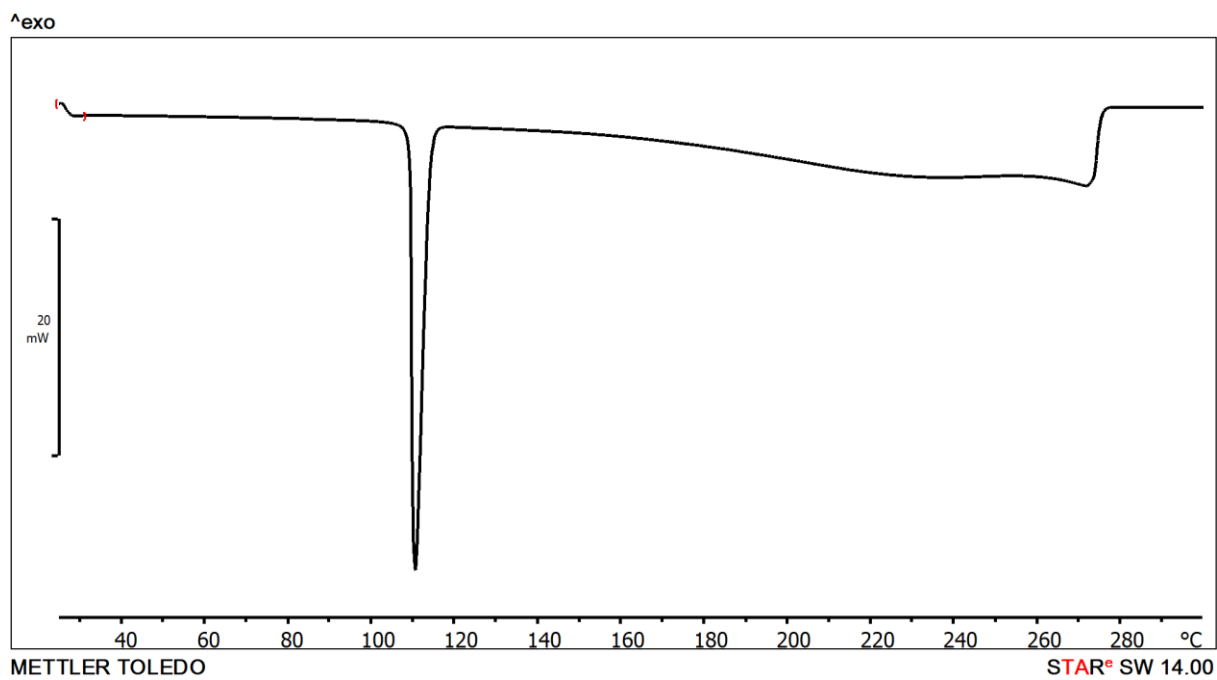

**Figure D34.** DSC thermogram of the (13fib)(acr).

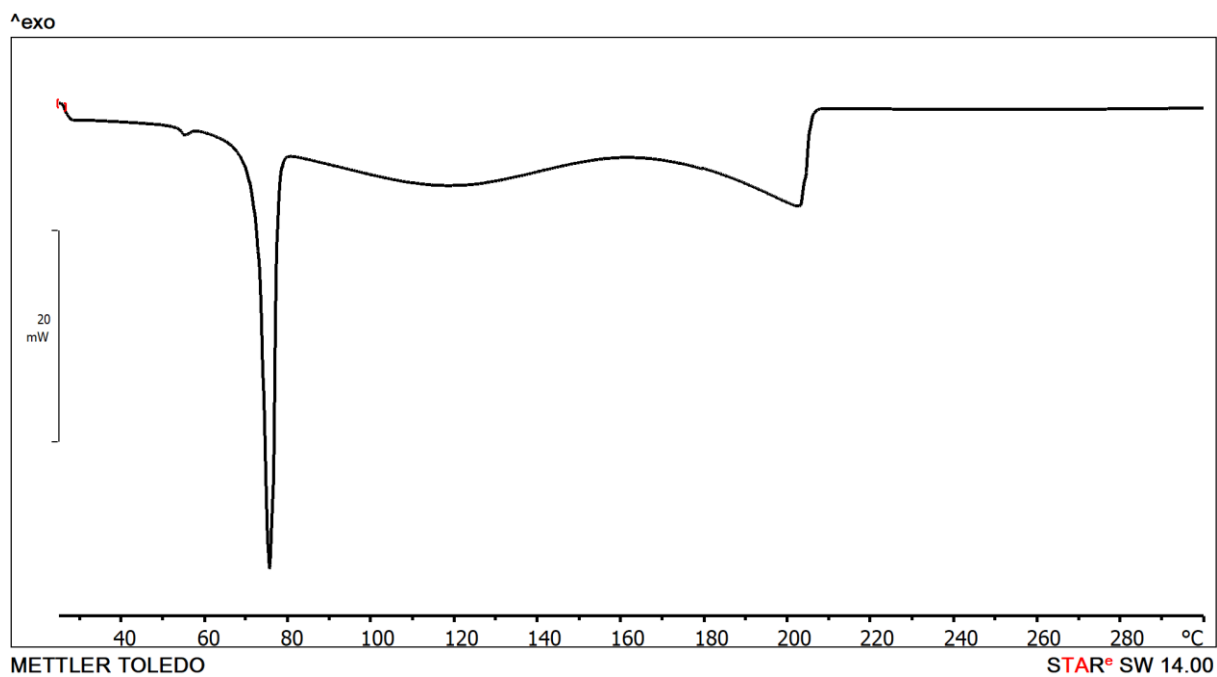

**Figure D35.** DSC thermogram of the (14fib)(2pic)<sub>2</sub>.

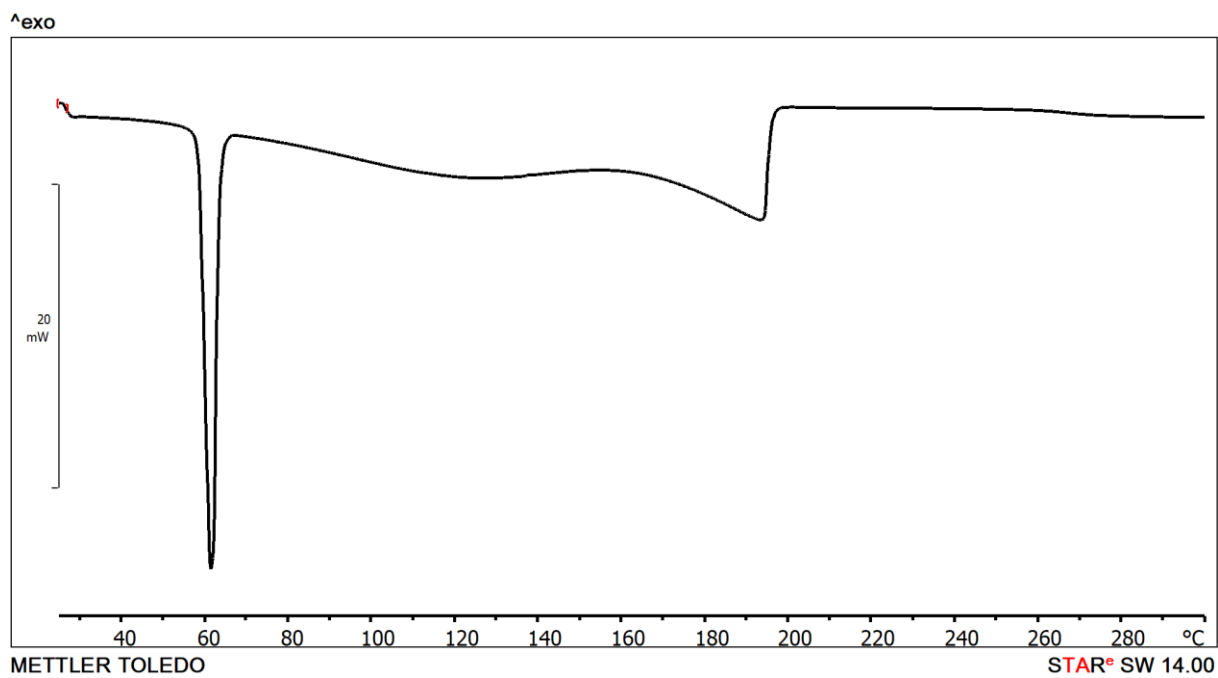

**Figure D36.** DSC thermogram of the (14fib)(3pic)<sub>2</sub>.

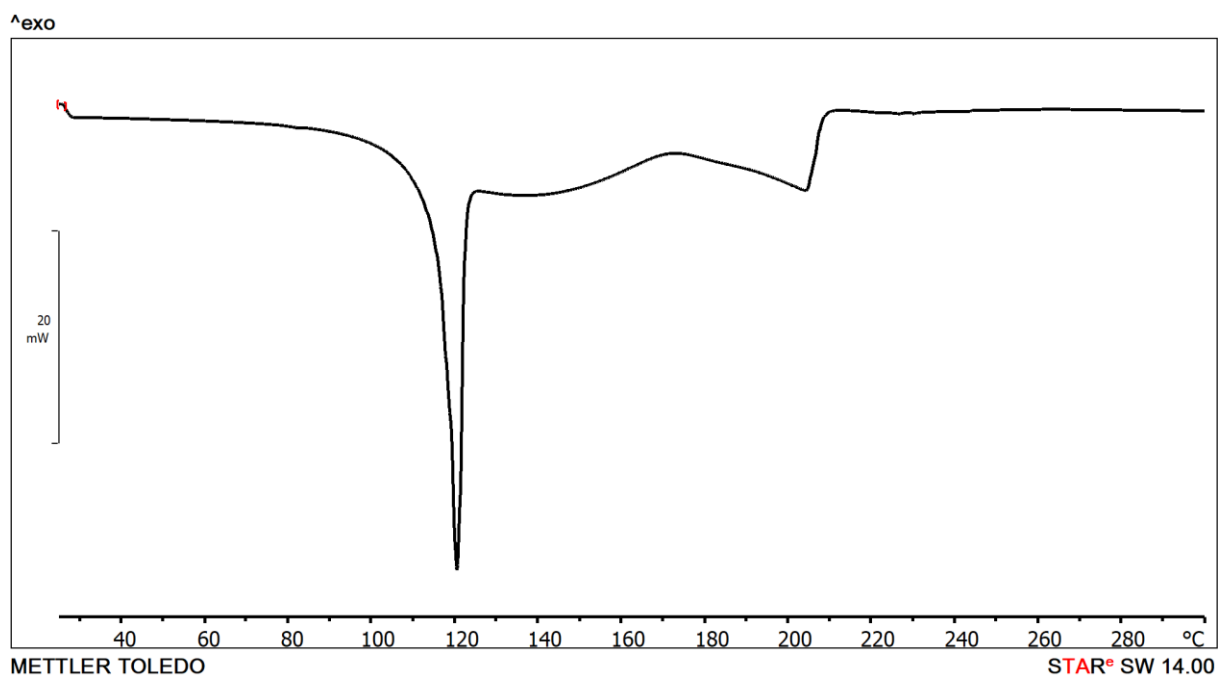

**Figure D37.** DSC thermogram of the (14fib)(4pic)<sub>2</sub>.

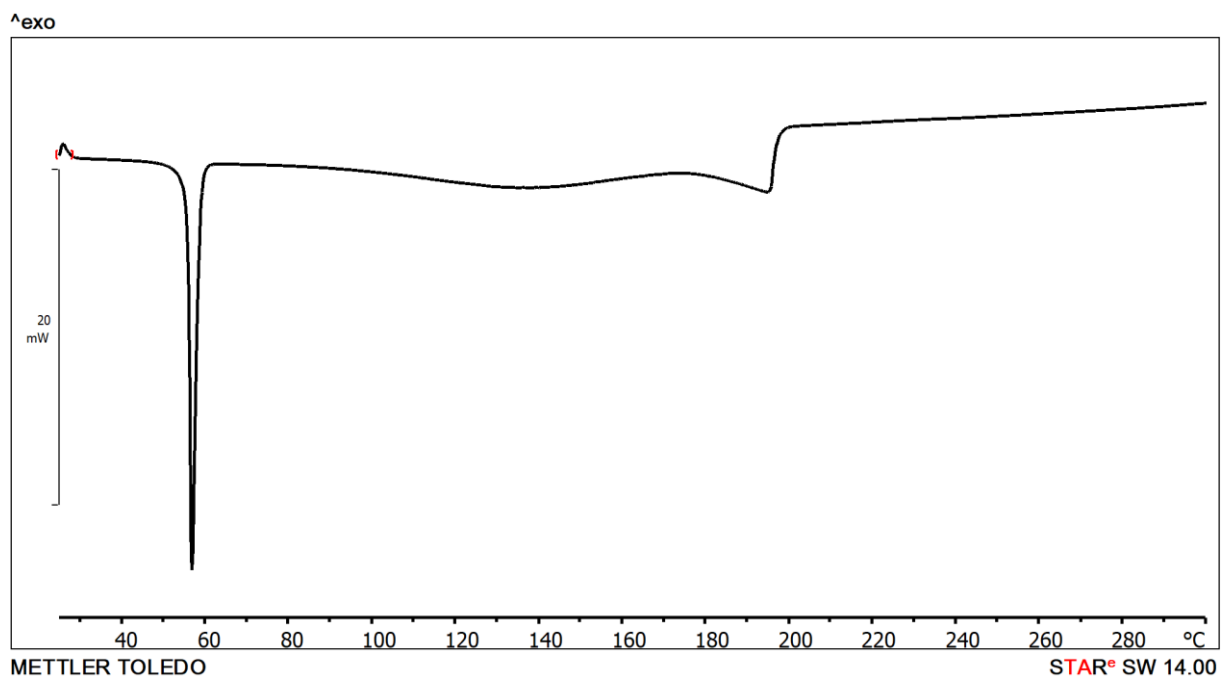

**Figure D38.** DSC thermogram of the (14fib)(24lut)<sub>2</sub>.

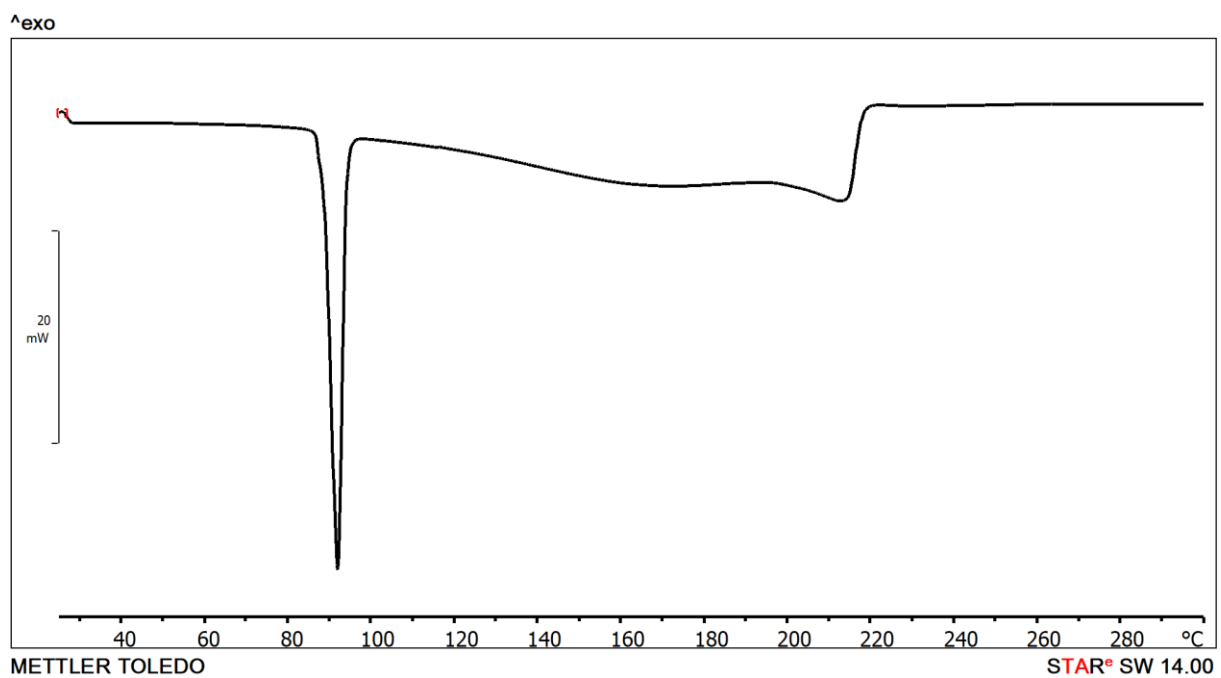

**Figure D39.** DSC thermogram of the (14fib)(35lut)<sub>2</sub>.

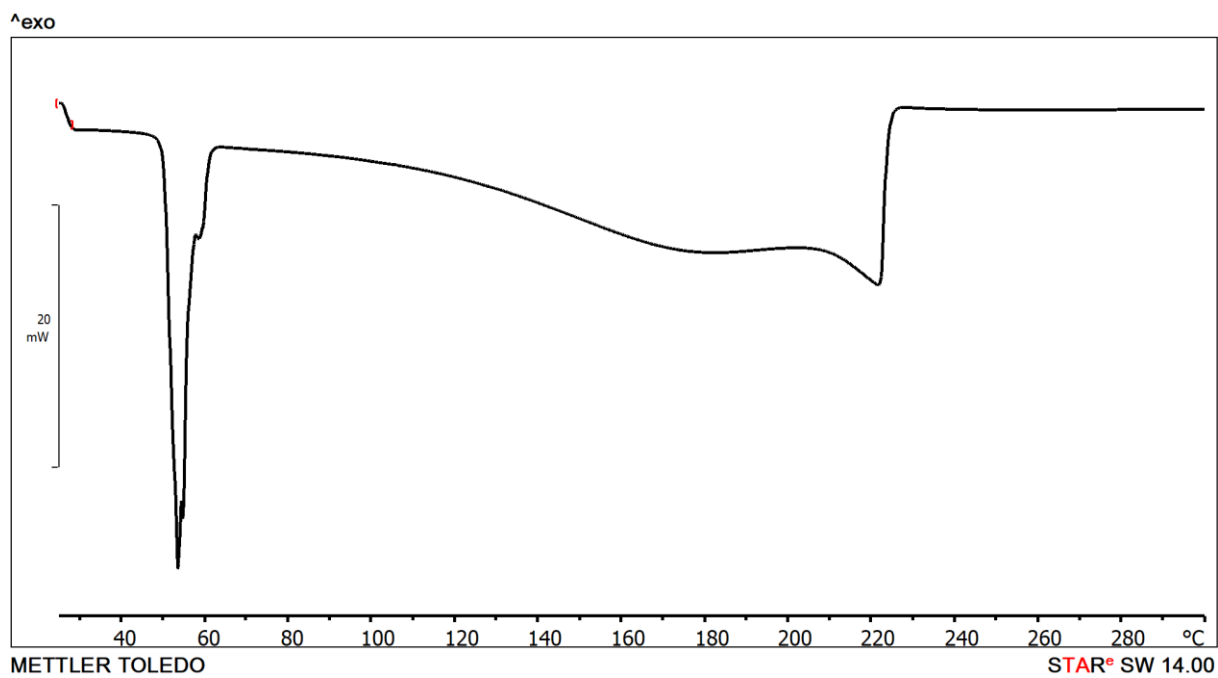

**Figure D40.** DSC thermogram of the (14fib)(246col).

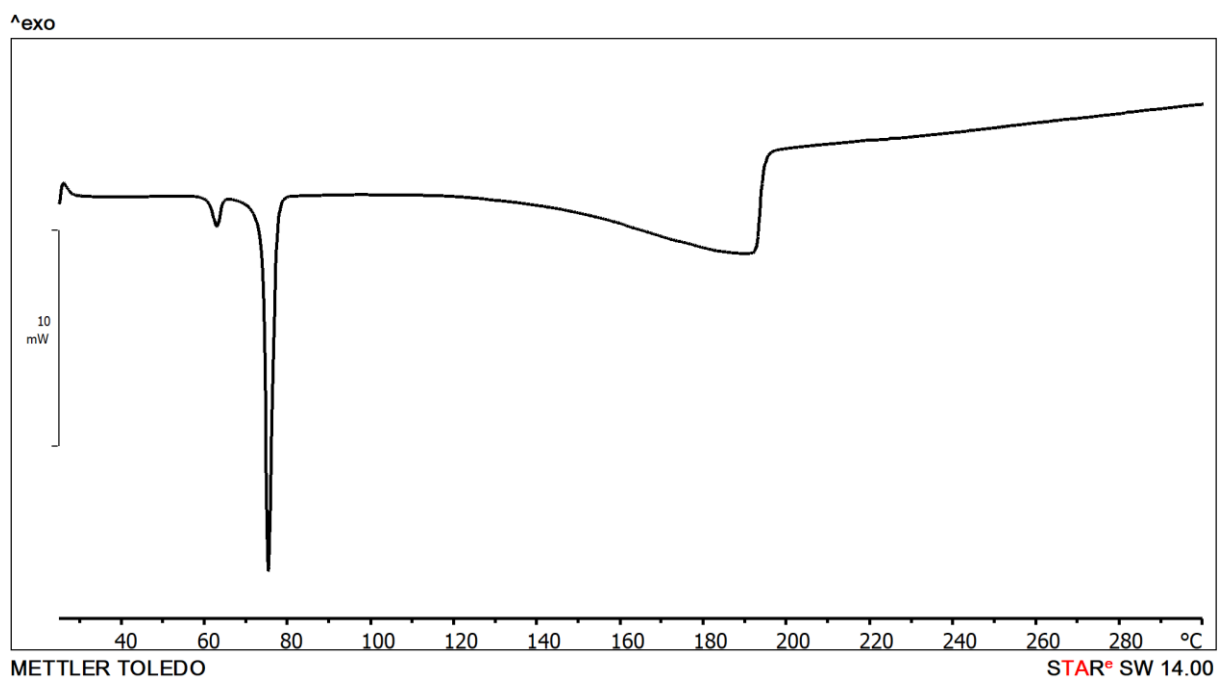

**Figure D41.** DSC thermogram of the (14fib)(3acpy)<sub>2</sub>.

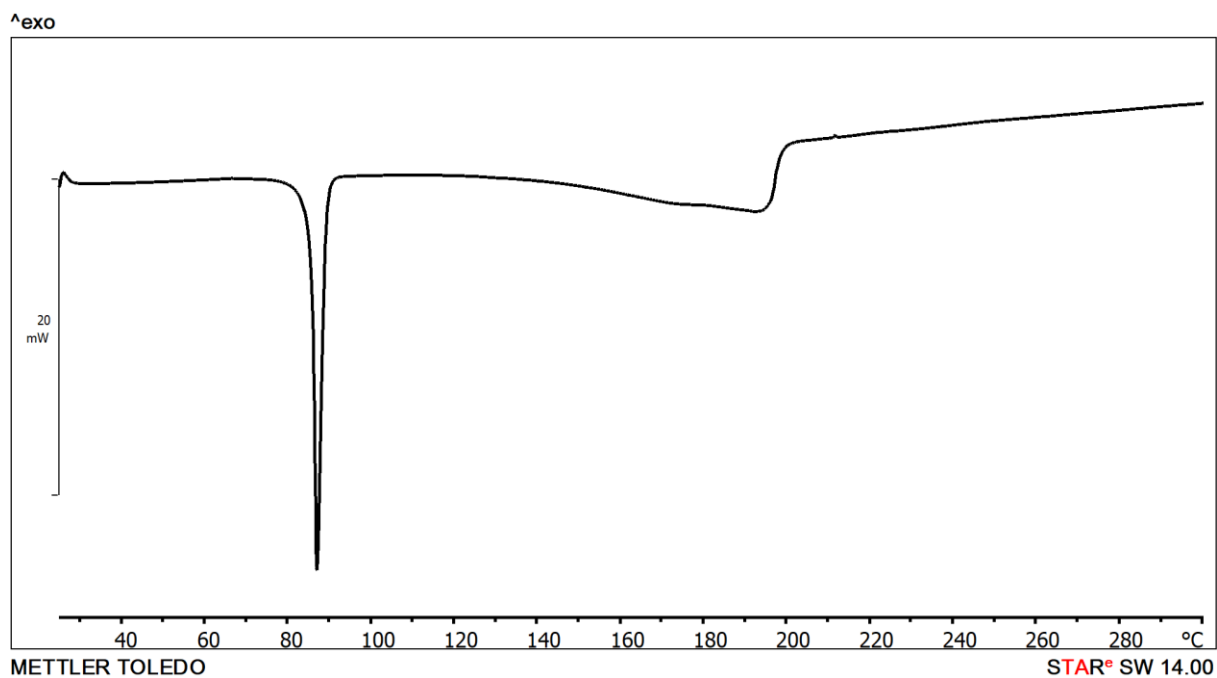

**Figure D42.** DSC thermogram of the (14fib)(4acpy)<sub>2</sub>.

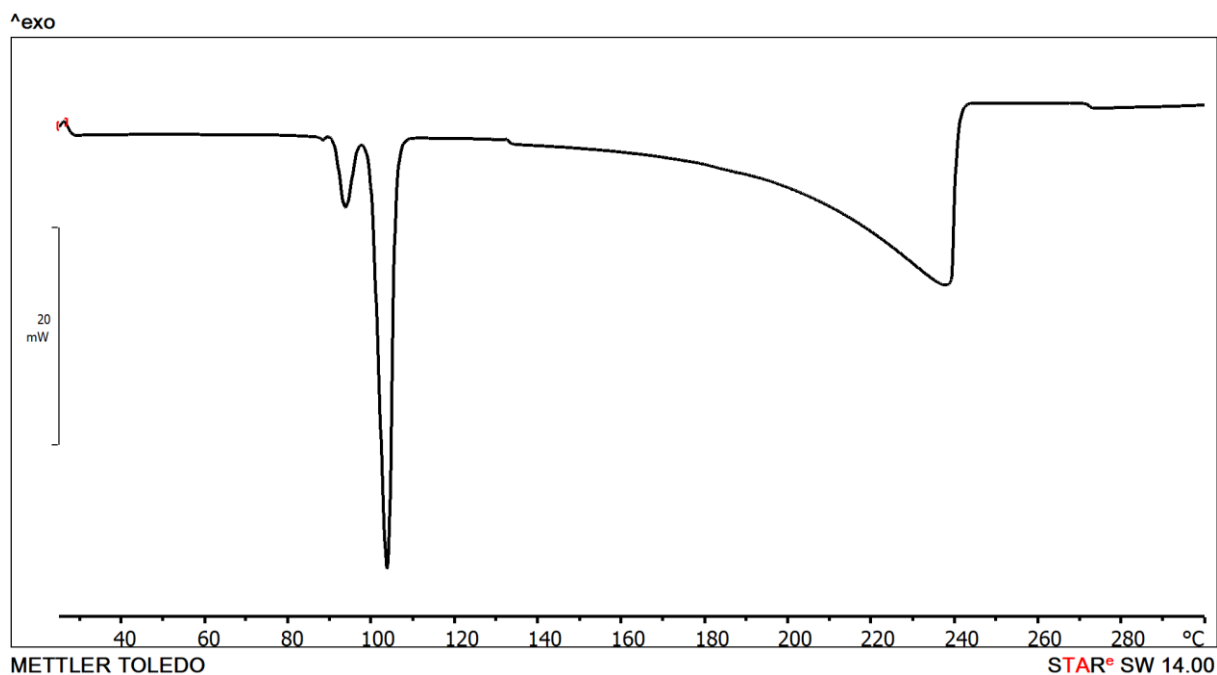

**Figure D43.** DSC thermogram of the (14fib)(qin)<sub>2</sub>.



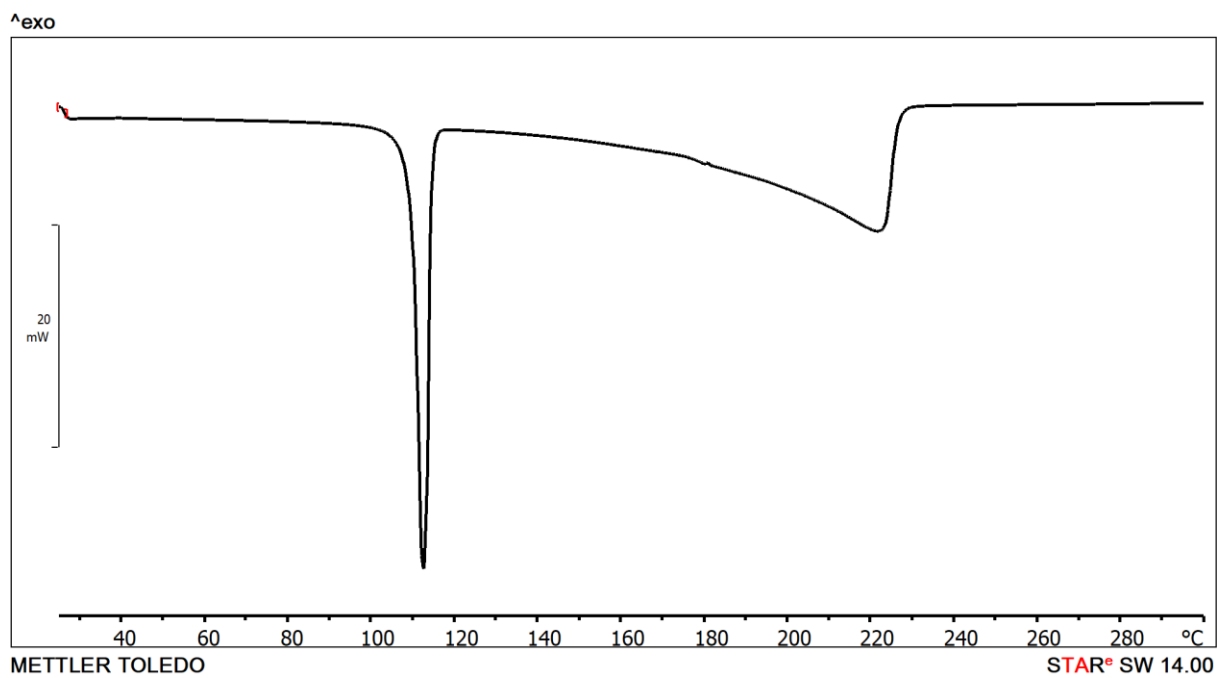

**Figure D44.** DSC thermogram of the (14tfib)(ikin)<sub>2</sub>.

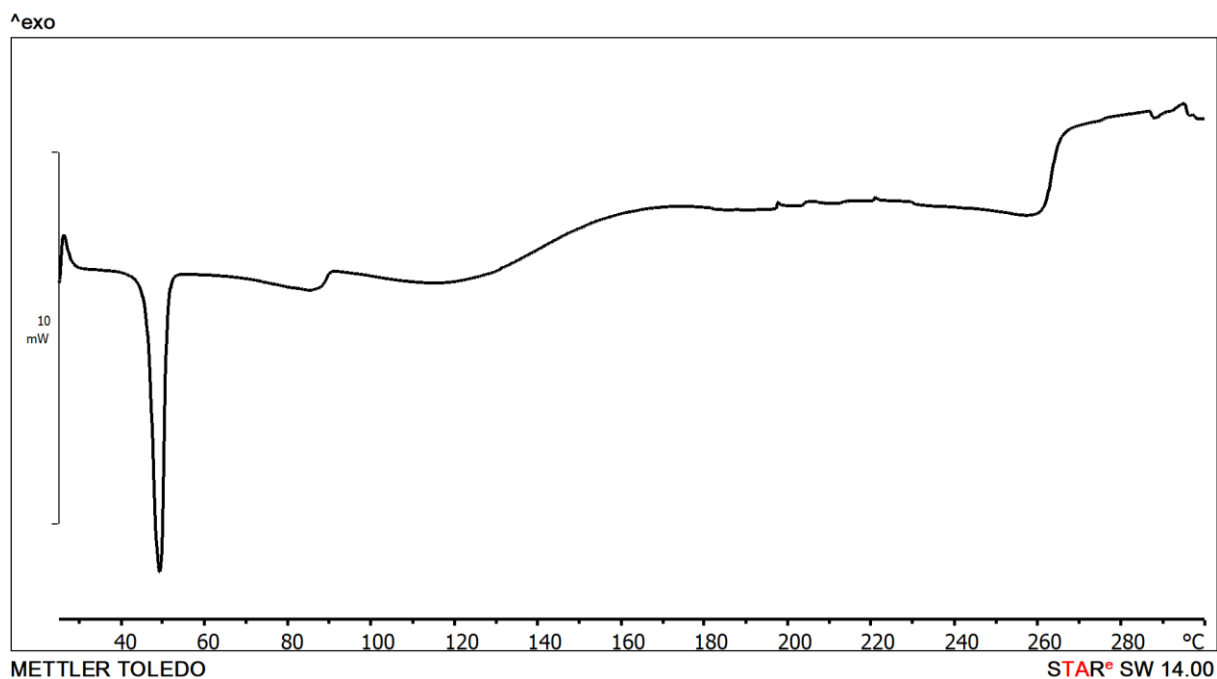

**Figure D45.** DSC thermogram of the (135titfb)(3pic)<sub>2</sub>.

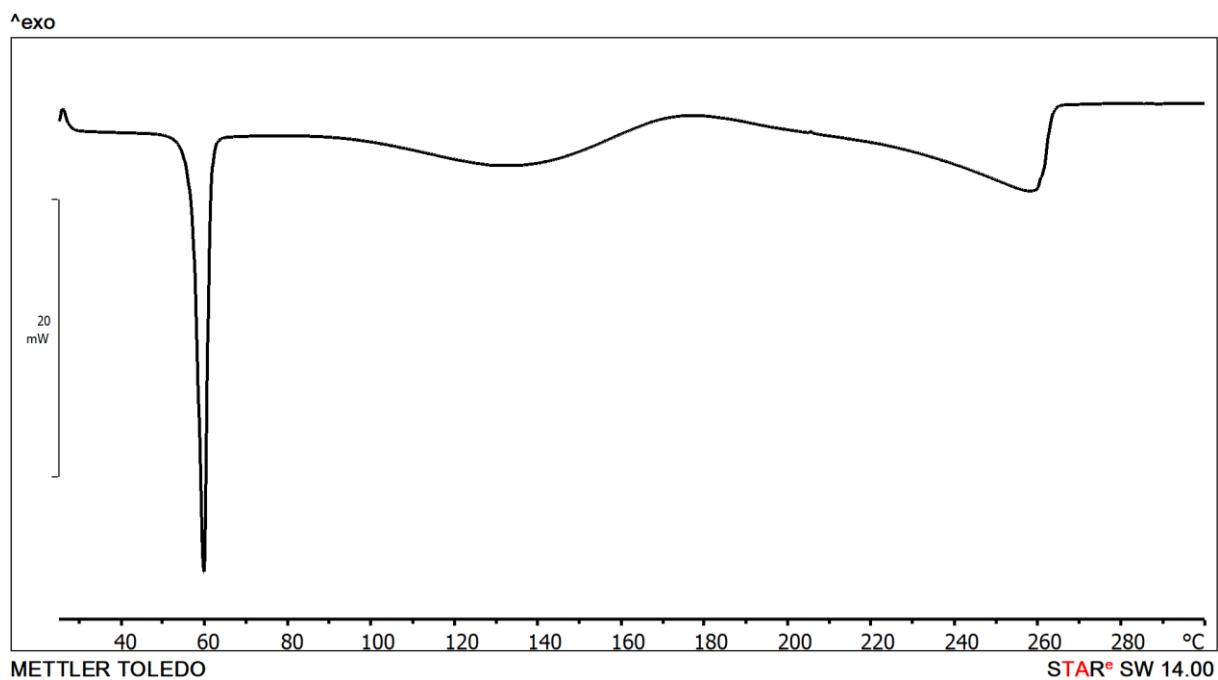

**Figure D46.** DSC thermogram of the  $(135\text{titfb})(24\text{lut})_2$ .

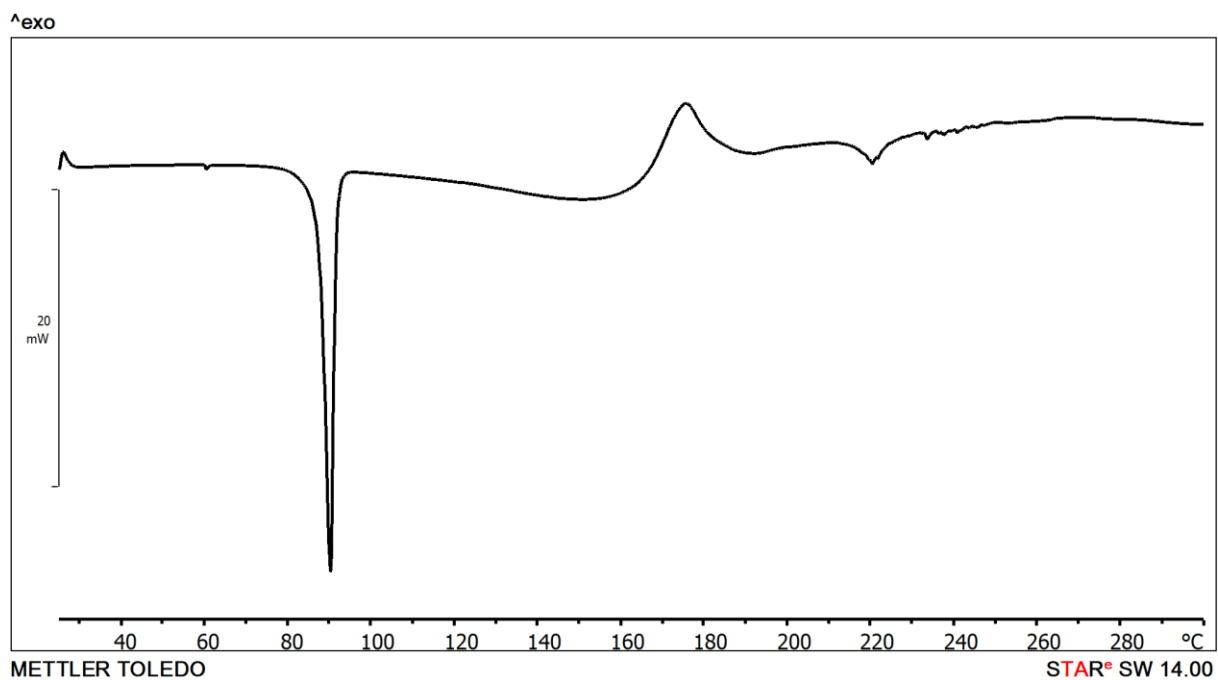

**Figure D47.** DSC thermogram of the  $(135\text{titfb})(34\text{lut})_3$ .

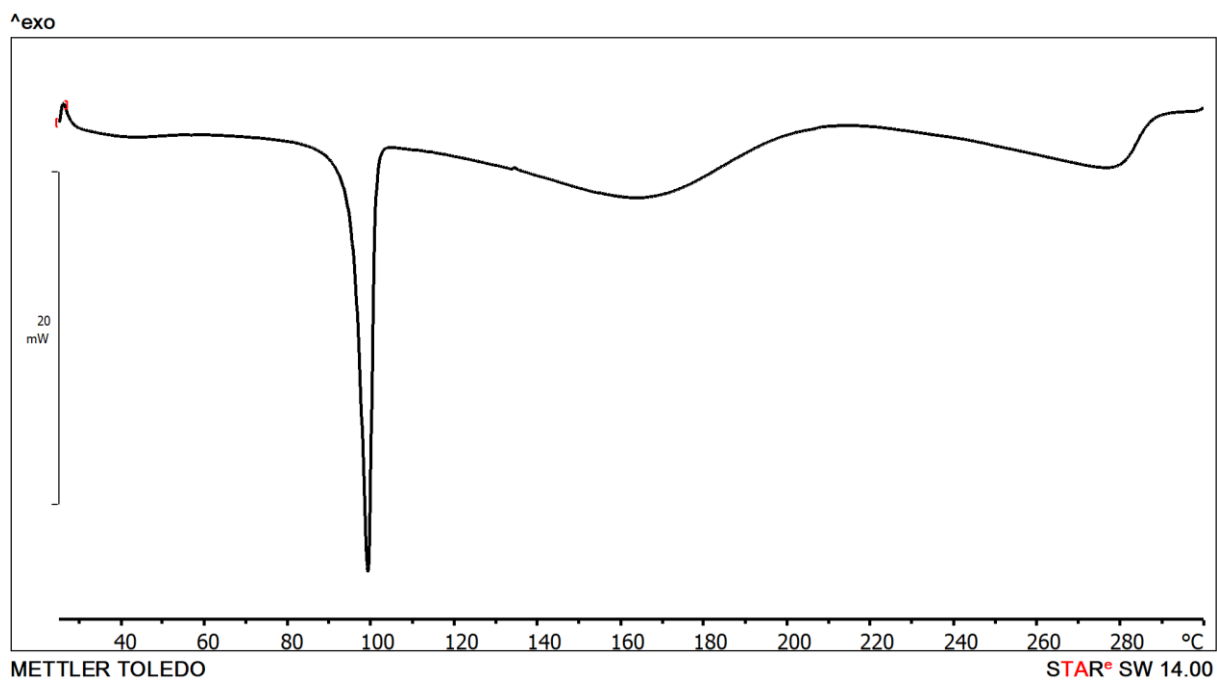

**Figure D48.** DSC thermogram of the (135titfb)(35lut)<sub>3</sub>.

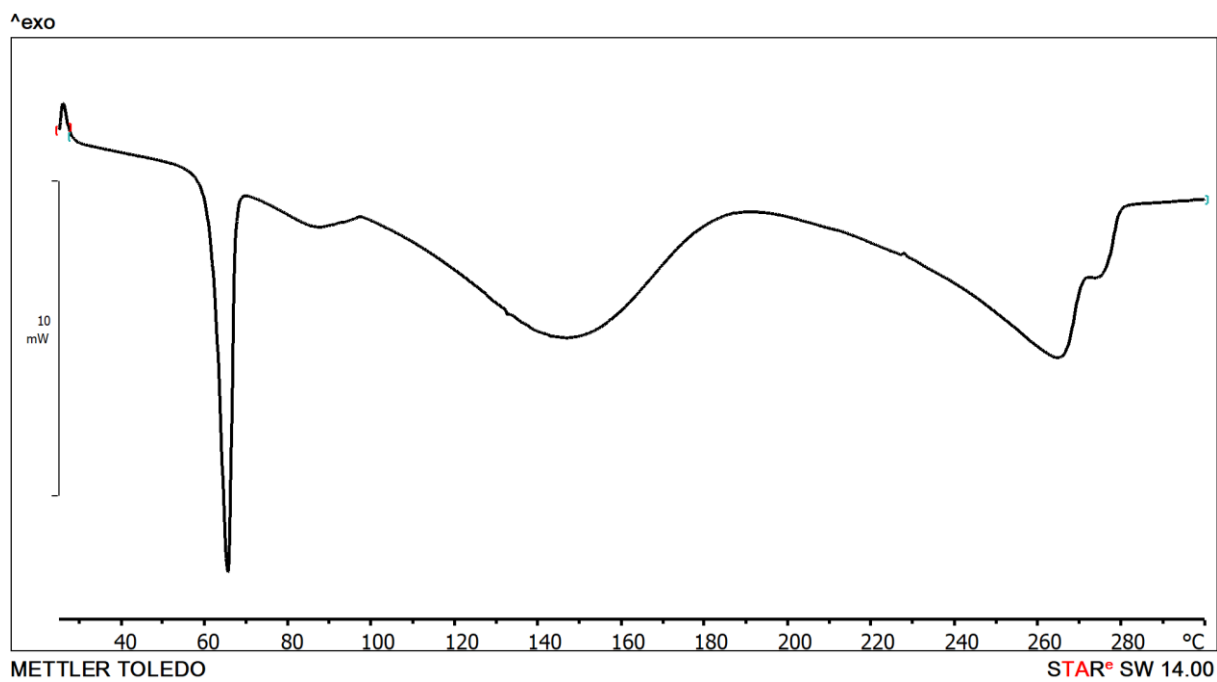

**Figure D49.** DSC thermogram of the (135titfb)(246col)<sub>3</sub>.

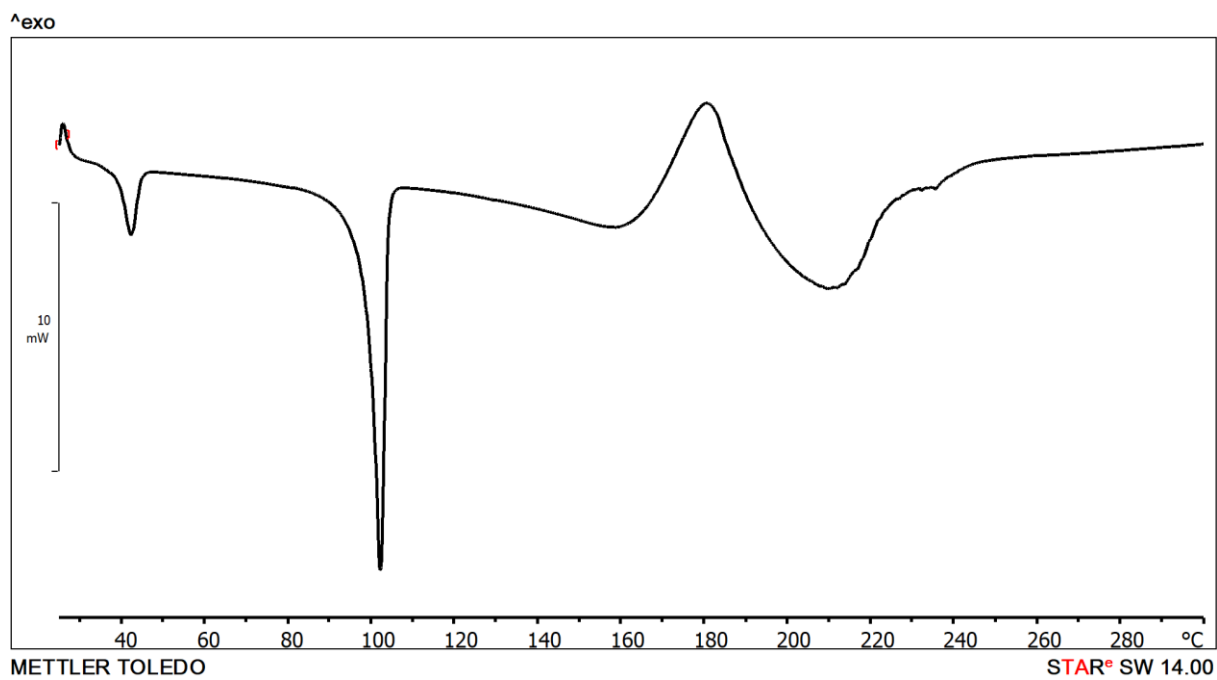

**Figure D50.** DSC thermogram of the (135titfb)(3acpy).

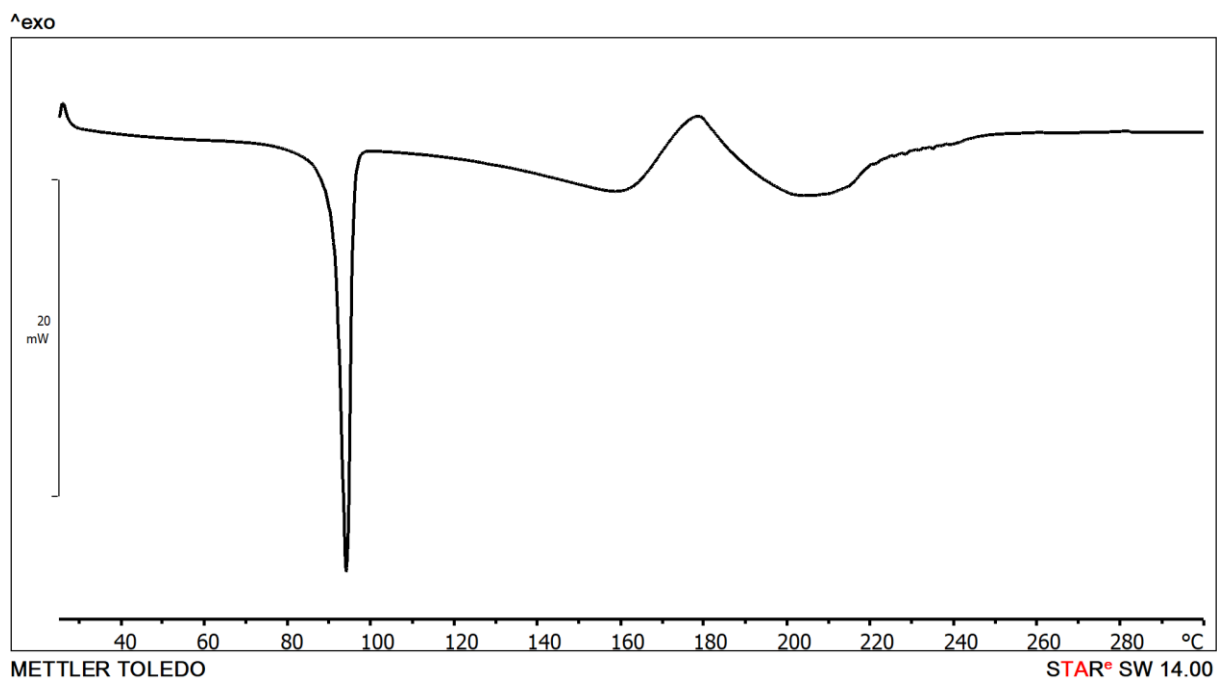

**Figure D51.** DSC thermogram of the (135titfb)(4acpy)<sub>2</sub>.

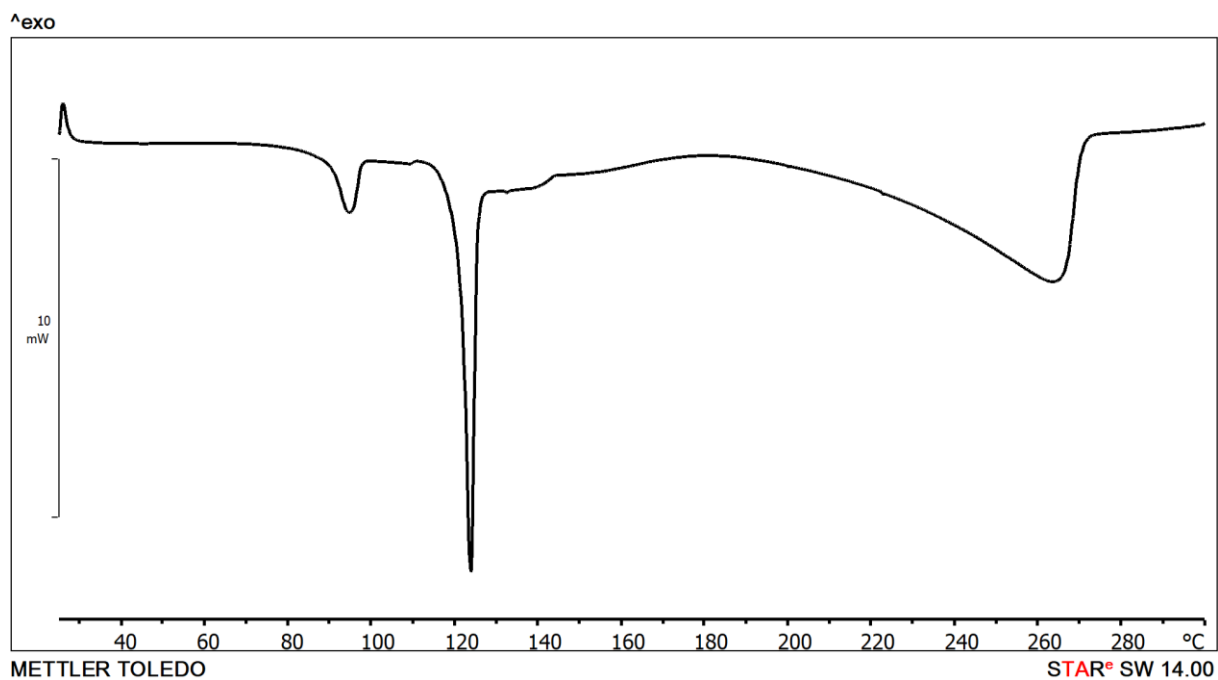

**Figure D52.** DSC thermogram of the (135titf)(4cnpy).

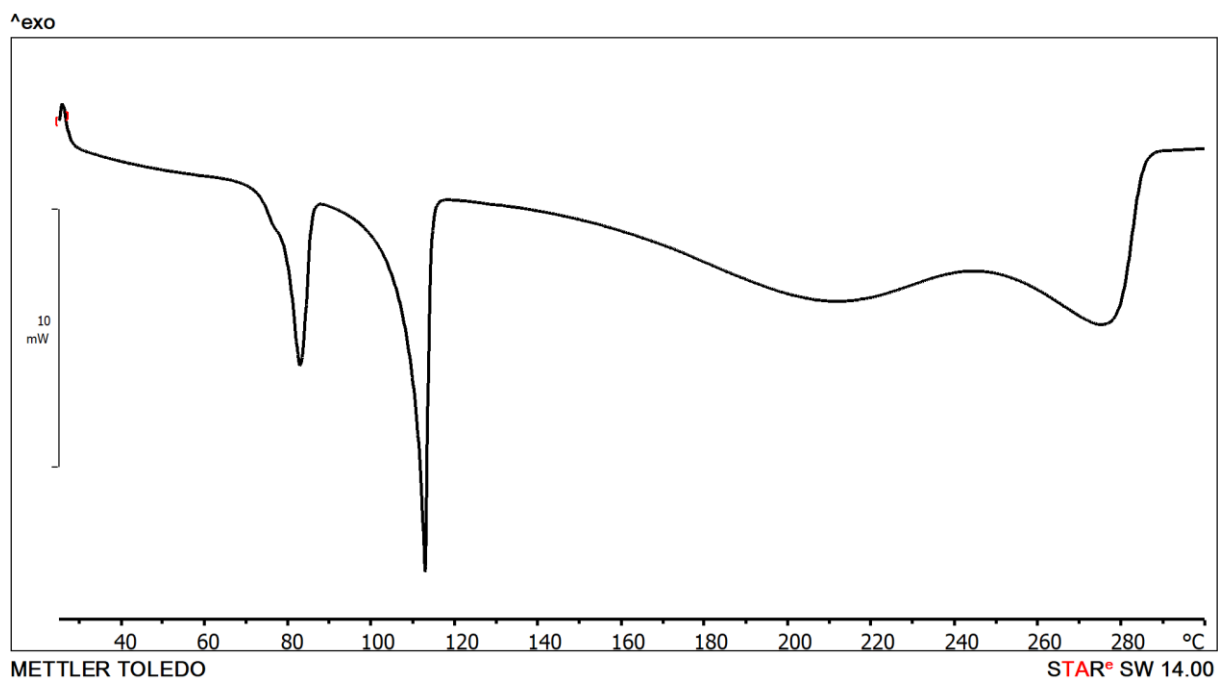

**Figure D53.** DSC thermogram of the (135titf)(qin).

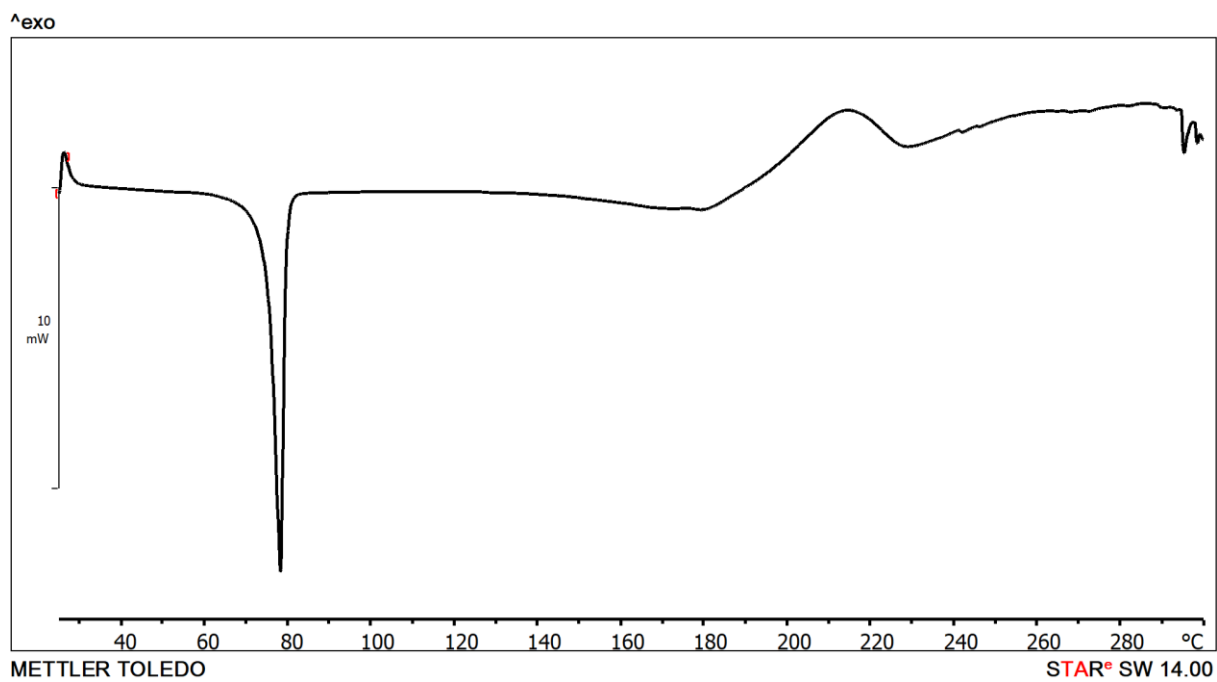

**Figure D54.** DSC thermogram of the  $(135\text{titf})(\text{iqin})_2$ .
